# Supplementary material for: Prognostic Signature Development on the Basis of Macrophage Phagocytosis‐Mediated Oxidative Phosphorylation in Bladder Cancer
Source: Hindawi journal article supplement (doi:10.1155/2022/4754935), 2022-01-01

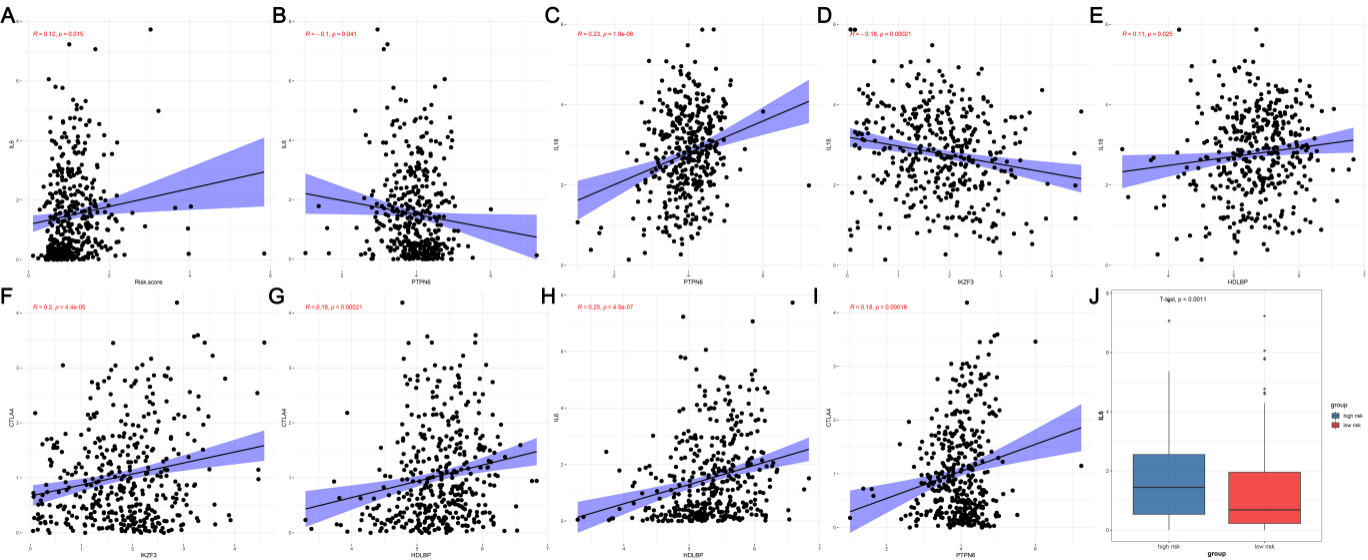

Supplement: f4 [file 4754935.f4.pdf]
