# Supplementary material for: Prognostic Signature Development on the Basis of Macrophage Phagocytosis‐Mediated Oxidative Phosphorylation in Bladder Cancer
Source: Hindawi journal article supplement (doi:10.1155/2022/4754935), 2022-01-01
Supplement: f5 [file 4754935.f5.pdf]

TCGA and GEO database bladder cancer expression profiling dataset

| Dataset ID | Platform | Bladder cancer | Normal |
|------------|----------|----------------|--------|
| TCGA       | -        | 418            | 38     |
| GSE13507   | GPL6102  | 246            | 10     |
| GSE69795   | GPL6244  | 61             | 0      |

Basic information of tumor patients in TCGA dataset

| Characteristic |               | Number |
|----------------|---------------|--------|
| Gender         | Male          | 308    |
|                | Female        | 109    |
| Age            | >60           | 326    |
|                | <60           | 91     |
| Subtype        | Papillary     | 135    |
|                | Non-Papillary | 277    |
| Grade          | Low           | 21     |
|                | High          | 393    |
| M              | M0            | 200    |
|                | M1            | 11     |
|                | MX            | 203    |
| N              | N0            | 241    |
|                | N1-3          | 133    |
|                | NX            | 37     |
| T              | T1-2          | 125    |
|                | T3-4          | 258    |
| Stage          | I             | 3      |
|                | II            | 131    |
|                | III           | 143    |
|                | IV            | 138    |
| Tobacco        | >1 year       | 293    |
|                | <1 year       | 110    |
