# Supplementary material for: Prognostic Signature Development on the Basis of Macrophage Phagocytosis‐Mediated Oxidative Phosphorylation in Bladder Cancer
Source: Hindawi journal article supplement (doi:10.1155/2022/4754935), 2022-01-01
Supplement: f6 [file 4754935.f6.pdf]

List of 223 regulators of macrophage phagocytosis

CD47

SIRPA

PTPN6

PTPN11

MYC

FCGR2A

GNE

CMAS

NANS

C1GALT1C1

QPCTL

SLC35A1

MS4A1

CAB39

UBE2D3

ARID1A

PDCD10

C1GALT1

PTEN

APMAP

RTN4IP1

AIFM1

FDX1

NDUFA1

GTPBP6

NDUFS8

SMARCC1

TACO1

CMC1

ATP5SL

SLC39A9

SS18

CHMP1A

GRSF1

C17ORF89

NDUFAF7

PDE12

UQCC1

NDUFAF5

HIGD2A

NDUFB9

MECR

WDR1

COX18

RHOH

HMGB1

SLC25A1

NDUFS6

FOXO1

TMEM261

HMGB2

CS  
POU2F2  
ADAM10  
NDUFB6  
MTIF3  
MTO1  
UBR4  
NDUFB4  
LIPT2  
HMHA1  
YBEY  
ALAD  
NXT1  
OTUB1  
NDUFV1  
GTPBP3  
NUBPL  
NDUFS2  
NDUFB11  
LDB1  
SAM4B  
C1ORF233  
ZBTB7A  
TIMMDC1  
STK4  
AP000721.4  
STARD7  
NFIA  
UBE2K  
VPS37A  
NDUFA9  
NDUFA8  
ELOVL1  
COX5B  
PTPRC  
NDUFAF3  
ACTB  
HMBS  
NDUFC1  
ARID1B  
SPI1  
TMEM38B  
NDUFS7  
PRKCD  
GFI1  
SMAGP  
MUC21  
ST6GALNAC1  
ITGB2  
OSR2  
MUC1  
CD1C

GAL3ST4  
FUT6  
ST3GAL1  
LRRC15  
TLE3  
PRDM1  
SPN  
MUC12  
HDAC9  
ELOVL6  
GFI1B  
IRX5  
MS4A7  
MS4A14  
C5AR1  
CD44  
IQGAP2  
CBFA2T3  
JMJD1C  
CD38  
ALCAM  
PPAP2B  
FCGR2B  
PODXL  
HIC1  
BCL9L  
MAML2  
SPIB  
CLIC4  
SLA  
PIK3AP1  
FAR1  
MAML1  
POU2AF1  
ZEB2  
SASH3  
SLC9A3R1  
DOCK11  
HES7  
BCOR  
TSPAN15  
GAL3ST2  
RAC2  
FOXO4  
AXL  
LIMK2  
SLC39A13  
CADM1  
CAPN6  
MAML3  
CLDN18  
ST3GAL2

VSIG8  
IKZF3  
CEBPE  
SYK  
FMNL3  
MAP3K3  
ICAM1  
EZR  
FCGR1B  
LCK  
FMNL1  
GPR114  
GRHL1  
PNMA5  
ZC3HAV1  
VCAM1  
ZNF746  
BTK  
FAM81A  
SLA2  
ZNF683  
CD79B  
CIITA  
PPP3CA  
ZBTB7B  
BCL6  
MSN  
IER5L  
TCEB1  
MAK  
MAP3K10  
ZNF311  
MOB3A  
FCRL3  
ZDBF2  
LCA5L  
CIT  
GCNT1  
TMEM119  
SIX4  
SUV420H1  
GYPA  
ISL2  
ZFX  
TP73  
SYT1  
MEX3B  
RNF122  
LPIN2  
MED13  
NHLRC2  
ACTR2

NCKAP1L  
SUPT20H  
ACTR3  
ABI1  
DOCK2  
CYFIP1  
ARPC2  
ARPC4-TTLL3  
FLII  
ARPC4  
SPPL3  
LCMT1  
RAC1  
ARPC3  
MAPK1  
AMBRA1  
MYO9B  
RPL21  
AIP  
KIF23  
OSTC  
FADD  
ANAPC7  
JAK1  
HDLBP  
WASF2  
RRAGA  
KLF6  
TM2D1  
EMC1  
TMEM165  
BIN2  
MGAT1  
BRK1  
LAMTOR4  
RP11-45M22.4  
TM2D2  
BRD2  
USP22  
XPR1  
PTDSS1  
LAMTOR2  
ZNF217  
PIK3R5  
ITGAL  
TSC2  
CDK2  
OTUD5  
SPTSSA  
TM9SF3  
UBE2J1  
ARHGDIG

LCE1A  
ARSB  
NUP153  
CXCL6  
DOLPP1  
HRC  
RCOR1  
SPTLC2  
MIB2  
USP34  
GNAI2  
BASP1
