# Supplementary material for: Prognostic Signature Development on the Basis of Macrophage Phagocytosis‐Mediated Oxidative Phosphorylation in Bladder Cancer
Source: Hindawi journal article supplement (doi:10.1155/2022/4754935), 2022-01-01
Supplement: f7 [file 4754935.f7.pdf]

| gene    | R     | P value    |
|---------|-------|------------|
| AXL     | 0.28  | 4.9E-09    |
| BASP    | 0.97  | 2.2E-16    |
| GNAI2   | 0.25  | 0.00000046 |
| HIC1    | 0.28  | 5.7E-09    |
| LRRC15  | 0.25  | 0.00000039 |
| RNF122  | 0.25  | 0.00000031 |
| ABI1    | -0.14 | 0.0035     |
| ACTB    | 0.16  | 0.0011     |
| ADAM10  | -0.11 | 0.026      |
| AIP     | 0.1   | 0.044      |
| ARID1B  | -0.1  | 0.039      |
| ARPC4   | 0.12  | 0.014      |
| ARSB    | 0.17  | 0.00052    |
| BCL6    | -0.18 | 0.00019    |
| BCOR    | -0.15 | 0.0022     |
| BIN2    | 0.17  | 0.00047    |
| BRK1    | 0.12  | 0.02       |
| C5AR1   | 0.22  | 0.0000053  |
| CADM1   | 0.1   | 0.041      |
| CIITA   | 0.11  | 0.028      |
| CLIC4   | 0.19  | 0.000073   |
| DOCK11  | 0.18  | 0.00022    |
| EZR     | -0.11 | 0.026      |
| FAR1    | -0.14 | 0.0048     |
| FCGR2A  | 0.24  | 0.00000089 |
| FMNL1   | 0.24  | 0.0000013  |
| FMNL3   | 0.2   | 0.00004    |
| FOXO1   | 0.1   | 0.038      |
| GAL3ST4 | 0.2   | 0.000053   |
| GCNT1   | 0.13  | 0.011      |
| GRHL1   | -0.14 | 0.005      |
| GRSF1   | -0.11 | 0.022      |
| GTPBP3  | -0.1  | 0.036      |
| HMHA1   | 0.13  | 0.01       |
| HRCT1   | 0.11  | 0.021      |
| ICAM1   | 0.2   | 0.000038   |
| ITGAL   | 0.13  | 0.0069     |
| ITGB2   | 0.2   | 0.000057   |
| KLF6    | 0.21  | 0.000011   |
| LAMTOR2 | 0.14  | 0.0048     |
| LCK     | 0.15  | 0.0027     |
| MAML3   | -0.21 | 0.000018   |
| MAP3K3  | 0.19  | 0.000083   |
| MDSC    | 0.22  | 0.0000057  |
| MGAT1   | 0.15  | 0.0021     |
| MOB3A   | 0.22  | 0.000009   |

|           |        |             |
|-----------|--------|-------------|
| MS4A7     | 0.21   | 0.000012    |
| MSN       | 0.16   | 0.001       |
| MYO9B     | 0.15   | 0.0025      |
| NCKAP1L   | 0.18   | 0.00017     |
| NDUF5AF5  | -0.12  | 0.013       |
| NDUFB6    | 0.13   | 0.008       |
| NHLRC2    | -0.19  | 0.0001      |
| NUBPL     | -0.14  | 0.0037      |
| PIK3AP1   | 0.15   | 0.0026      |
| PRDM1     | 0.16   | 0.001       |
| PRKCD     | -0.15  | 0.003       |
| PTPRC     | 0.16   | 0.0011      |
| RAC2      | 0.21   | 0.000011    |
| RCOR1     | -0.17  | 0.00065     |
| RRAGA     | 0.13   | 0.0067      |
| SASH3     | 0.2    | 0.00006     |
| SIRPA     | 0.23   | 0.0000027   |
| SIX4      | -0.11  | 0.0024      |
| SLA       | 0.18   | 0.00025     |
| SLC9A3R1  | -0.11  | 0.029       |
| SLC25A1   | -0.13  | 0.0075      |
| SLC35A1   | -0.087 | 0.078       |
| SLC39A13  | 0.27   | 0.000000021 |
| SPI1      | 0.22   | 0.0000045   |
| SPPL3     | -0.12  | 0.012       |
| ST3GAL1   | -0.11  | 0.02        |
| ST3GAL2   | 0.18   | 0.0003      |
| ST6GALNAC | -0.22  | 0.00001     |
| STK4      | 0.12   | 0.019       |
| SYT1      | -0.12  | 0.012       |
| TM2D1     | -0.13  | 0.0089      |
| TM9SF3    | -0.18  | 0.00025     |
| TMEM119   | 0.21   | 0.000026    |
| TSC2      | -0.1   | 0.038       |
| UBE2J1    | 0.13   | 0.0076      |
| UQCC1     | -0.12  | 0.013       |
| VCAM1     | 0.19   | 0.00012     |
| WASF2     | -0.11  | 0.031       |
| WDR1      | 0.1    | 0.034       |
| XPR1      | 0.13   | 0.0063      |
| ZBTB7A    | -0.15  | 0.0027      |
| ZBTB7B    | -0.12  | 0.017       |
