# Supplementary material for: Prognostic Signature Development on the Basis of Macrophage Phagocytosis‐Mediated Oxidative Phosphorylation in Bladder Cancer
Source: Hindawi journal article supplement (doi:10.1155/2022/4754935), 2022-01-01
Supplement: f8 [file 4754935.f8.pdf]

|            | ONTOLOGY | ID         | Description                                            | GeneRatio | BgRatio   | pvalue   | p.adjust | qvalue   | Count |
|------------|----------|------------|--------------------------------------------------------|-----------|-----------|----------|----------|----------|-------|
| GO:0033108 | BP       | GO:0033108 | mitochondrial respiratory chain complex assembly       | 19/207    | 93/8723   | 4.10E-19 | 1.40E-15 | 1.08E-15 | 19    |
| GO:0010257 | BP       | GO:0010257 | NADH dehydrogenase complex assembly                    | 15/207    | 57/8723   | 3.96E-17 | 4.51E-14 | 3.49E-14 | 15    |
| GO:0032981 | BP       | GO:0032981 | mitochondrial respiratory chain complex I assembly     | 15/207    | 57/8723   | 3.96E-17 | 4.51E-14 | 3.49E-14 | 15    |
| GO:0006120 | BP       | GO:0006120 | mitochondrial electron transport, NADH to ubiquinone   | 12/207    | 51/8723   | 2.63E-13 | 2.25E-10 | 1.74E-10 | 12    |
| GO:0019646 | BP       | GO:0019646 | aerobic electron transport chain                       | 13/207    | 87/8723   | 1.26E-11 | 8.60E-09 | 6.66E-09 | 13    |
| GO:0042773 | BP       | GO:0042773 | ATP synthesis coupled electron transport               | 13/207    | 95/8723   | 3.98E-11 | 1.94E-08 | 1.50E-08 | 13    |
| GO:0042775 | BP       | GO:0042775 | mitochondrial ATP synthesis coupled electron transport | 13/207    | 95/8723   | 3.98E-11 | 1.94E-08 | 1.50E-08 | 13    |
| GO:0045785 | BP       | GO:0045785 | positive regulation of cell adhesion                   | 24/207    | 437/187   | 1.11E-10 | 4.73E-08 | 3.66E-08 | 24    |
| GO:0050900 | BP       | GO:0050900 | leukocyte migration                                    | 22/207    | 369/187   | 1.47E-10 | 5.57E-08 | 4.31E-08 | 22    |
| GO:0007159 | BP       | GO:0007159 | leukocyte cell-cell adhesion                           | 22/207    | 371/187   | 1.63E-10 | 5.57E-08 | 4.31E-08 | 22    |
| GO:0022904 | BP       | GO:0022904 | respiratory electron transport chain                   | 13/207    | 114/187   | 4.11E-10 | 1.17E-07 | 9.08E-08 | 13    |
| GO:0022409 | BP       | GO:0022409 | positive regulation of cell-cell adhesion              | 19/207    | 284/187   | 4.12E-10 | 1.17E-07 | 9.08E-08 | 19    |
| GO:0006119 | BP       | GO:0006119 | oxidative phosphorylation                              | 14/207    | 141/187   | 5.53E-10 | 1.45E-07 | 1.12E-07 | 14    |
| GO:0010592 | BP       | GO:0010592 | positive regulation of lamellipodium assembly          | 8/207     | 29/8723   | 6.86E-10 | 1.67E-07 | 1.29E-07 | 8     |
| GO:1903039 | BP       | GO:1903039 | positive regulation of leukocyte cell-cell adhesion    | 17/207    | 239/18723 | 1.41E-09 | 3.20E-07 | 2.48E-07 | 17    |
| GO:0009060 | BP       | GO:0009060 | aerobic respiration                                    | 15/207    | 189/187   | 3.04E-09 | 6.48E-07 | 5.02E-07 | 15    |
| GO:1902745 | BP       | GO:1902745 | positive regulation of lamellipodium organization      | 8/207     | 37/8723   | 5.72E-09 | 1.10E-06 | 8.48E-07 | 8     |
| GO:0030183 | BP       | GO:0030183 | B cell differentiation                                 | 13/207    | 141/187   | 5.78E-09 | 1.10E-06 | 8.48E-07 | 13    |
| GO:0030098 | BP       | GO:0030098 | lymphocyte differentiation                             | 20/207    | 374/187   | 6.81E-09 | 1.22E-06 | 9.48E-07 | 20    |

|                |    |                |                                                                |            |                   |          |          |          |    |
|----------------|----|----------------|----------------------------------------------------------------|------------|-------------------|----------|----------|----------|----|
| GO:19027<br>43 | BP | GO:1902<br>743 | regulation of lamellipodium organization                       | 9/2<br>07  | 54/1<br>872<br>3  | 7.17E-09 | 1.22E-06 | 9.48E-07 | 9  |
| GO:00343<br>14 | BP | GO:0034<br>314 | Arp2/3 complex-mediated actin nucleation                       | 8/2<br>07  | 39/1<br>872<br>3  | 8.94E-09 | 1.45E-06 | 1.12E-06 | 8  |
| GO:00229<br>00 | BP | GO:0022<br>900 | electron transport chain                                       | 14/<br>207 | 175/<br>187       | 9.35E-09 | 1.45E-06 | 1.12E-06 | 14 |
| GO:19031<br>31 | BP | GO:1903<br>131 | mononuclear cell differentiation                               | 21/<br>207 | 426/<br>187       | 1.17E-08 | 1.74E-06 | 1.35E-06 | 21 |
| GO:00105<br>91 | BP | GO:0010<br>591 | regulation of lamellipodium assembly                           | 8/2<br>07  | 42/1<br>872<br>3  | 1.67E-08 | 2.37E-06 | 1.84E-06 | 8  |
| GO:00081<br>54 | BP | GO:0008<br>154 | actin polymerization or depolymerization                       | 15/<br>207 | 218/<br>187       | 2.11E-08 | 2.88E-06 | 2.23E-06 | 15 |
| GO:00421<br>10 | BP | GO:0042<br>110 | T cell activation                                              | 22/<br>207 | 487/<br>187       | 2.48E-08 | 3.25E-06 | 2.52E-06 | 22 |
| GO:00224<br>07 | BP | GO:0022<br>407 | regulation of cell-cell adhesion                               | 21/<br>207 | 448/<br>187       | 2.80E-08 | 3.53E-06 | 2.74E-06 | 21 |
| GO:00453<br>33 | BP | GO:0045<br>333 | cellular respiration                                           | 15/<br>207 | 230/<br>187       | 4.31E-08 | 5.25E-06 | 4.06E-06 | 15 |
| GO:00325<br>35 | BP | GO:0032<br>535 | regulation of cellular component size                          | 19/<br>207 | 383/<br>187       | 5.47E-08 | 6.43E-06 | 4.98E-06 | 19 |
| GO:00975<br>81 | BP | GO:0097<br>581 | lamellipodium organization                                     | 10/<br>207 | 90/1<br>872       | 5.82E-08 | 6.62E-06 | 5.13E-06 | 10 |
| GO:00488<br>72 | BP | GO:0048<br>872 | homeostasis of number of cells                                 | 16/<br>207 | 272/<br>187       | 6.36E-08 | 7.01E-06 | 5.43E-06 | 16 |
| GO:00450<br>10 | BP | GO:0045<br>010 | actin nucleation                                               | 8/2<br>07  | 52/1<br>872       | 9.67E-08 | 1.01E-05 | 7.81E-06 | 8  |
| GO:00159<br>80 | BP | GO:0015<br>980 | energy derivation by oxidation of organic compounds            | 17/<br>207 | 318/<br>187<br>23 | 9.75E-08 | 1.01E-05 | 7.81E-06 | 17 |
| GO:00508<br>70 | BP | GO:0050<br>870 | positive regulation of T cell activation                       | 14/<br>207 | 216/<br>187       | 1.33E-07 | 1.33E-05 | 1.03E-05 | 14 |
| GO:00308<br>38 | BP | GO:0030<br>838 | positive regulation of actin filament polymerization           | 10/<br>207 | 99/1<br>872<br>3  | 1.45E-07 | 1.42E-05 | 1.10E-05 | 10 |
| GO:01200<br>32 | BP | GO:0120<br>032 | regulation of plasma membrane bounded cell projection assembly | 13/<br>207 | 186/<br>187<br>23 | 1.58E-07 | 1.50E-05 | 1.16E-05 | 13 |
| GO:00080<br>64 | BP | GO:0008<br>064 | regulation of actin polymerization or depolymerization         | 13/<br>207 | 188/<br>187<br>23 | 1.79E-07 | 1.60E-05 | 1.24E-05 | 13 |
| GO:00604<br>91 | BP | GO:0060<br>491 | regulation of cell projection assembly                         | 13/<br>207 | 188/<br>187       | 1.79E-07 | 1.60E-05 | 1.24E-05 | 13 |
| GO:00308<br>32 | BP | GO:0030<br>832 | regulation of actin filament length                            | 13/<br>207 | 189/<br>187       | 1.90E-07 | 1.66E-05 | 1.29E-05 | 13 |
| GO:19030<br>37 | BP | GO:1903<br>037 | regulation of leukocyte cell-cell adhesion                     | 17/<br>207 | 336/<br>187<br>23 | 2.14E-07 | 1.79E-05 | 1.38E-05 | 17 |

|            |    |            |                                                          |        |           |          |          |          |    |
|------------|----|------------|----------------------------------------------------------|--------|-----------|----------|----------|----------|----|
| GO:0030041 | BP | GO:0030041 | actin filament polymerization                            | 13/207 | 191/187   | 2.15E-07 | 1.79E-05 | 1.38E-05 | 13 |
| GO:0002703 | BP | GO:0002703 | regulation of leukocyte mediated immunity                | 14/207 | 226/18723 | 2.32E-07 | 1.88E-05 | 1.46E-05 | 14 |
| GO:0002687 | BP | GO:0002687 | positive regulation of leukocyte migration               | 11/207 | 135/187   | 3.13E-07 | 2.48E-05 | 1.92E-05 | 11 |
| GO:0022604 | BP | GO:0022604 | regulation of cell morphogenesis                         | 16/207 | 309/187   | 3.62E-07 | 2.80E-05 | 2.17E-05 | 16 |
| GO:0032273 | BP | GO:0032273 | positive regulation of protein polymerization            | 11/207 | 138/18723 | 3.91E-07 | 2.96E-05 | 2.30E-05 | 11 |
| GO:0046034 | BP | GO:0046034 | ATP metabolic process                                    | 15/207 | 277/187   | 4.82E-07 | 3.54E-05 | 2.74E-05 | 15 |
| GO:0030833 | BP | GO:0030833 | regulation of actin filament polymerization              | 12/207 | 172/18723 | 4.88E-07 | 3.54E-05 | 2.74E-05 | 12 |
| GO:0110053 | BP | GO:0110053 | regulation of actin filament organization                | 15/207 | 278/187   | 5.04E-07 | 3.58E-05 | 2.78E-05 | 15 |
| GO:0006091 | BP | GO:0006091 | generation of precursor metabolites and energy           | 20/207 | 490/18723 | 5.58E-07 | 3.89E-05 | 3.01E-05 | 20 |
| GO:1902905 | BP | GO:1902905 | positive regulation of supramolecular fiber organization | 13/207 | 209/18723 | 6.03E-07 | 4.12E-05 | 3.19E-05 | 13 |
| GO:1903706 | BP | GO:1903706 | regulation of hemopoiesis                                | 17/207 | 367/187   | 7.35E-07 | 4.92E-05 | 3.81E-05 | 17 |
| GO:0050863 | BP | GO:0050863 | regulation of T cell activation                          | 16/207 | 329/187   | 8.33E-07 | 5.46E-05 | 4.23E-05 | 16 |
| GO:0097529 | BP | GO:0097529 | myeloid leukocyte migration                              | 13/207 | 220/187   | 1.08E-06 | 6.94E-05 | 5.37E-05 | 13 |
| GO:0008360 | BP | GO:0008360 | regulation of cell shape                                 | 11/207 | 154/187   | 1.17E-06 | 7.39E-05 | 5.73E-05 | 11 |
| GO:0002697 | BP | GO:0002697 | regulation of immune effector process                    | 16/207 | 339/187   | 1.23E-06 | 7.62E-05 | 5.90E-05 | 16 |
| GO:0030032 | BP | GO:0030032 | lamellipodium assembly                                   | 8/207  | 72/1872   | 1.27E-06 | 7.62E-05 | 5.90E-05 | 8  |
| GO:0033627 | BP | GO:0033627 | cell adhesion mediated by integrin                       | 8/207  | 72/1872   | 1.27E-06 | 7.62E-05 | 5.90E-05 | 8  |
| GO:0043254 | BP | GO:0043254 | regulation of protein-containing complex assembly        | 18/207 | 428/18723 | 1.38E-06 | 8.13E-05 | 6.30E-05 | 18 |
| GO:0051495 | BP | GO:0051495 | positive regulation of cytoskeleton organization         | 13/207 | 226/18723 | 1.46E-06 | 8.43E-05 | 6.53E-05 | 13 |
| GO:0071674 | BP | GO:0071674 | mononuclear cell migration                               | 12/207 | 196/187   | 1.95E-06 | 0.00011  | 8.55E-05 | 12 |
| GO:0060326 | BP | GO:0060326 | cell chemotaxis                                          | 15/207 | 310/187   | 1.97E-06 | 0.00011  | 8.55E-05 | 15 |
| GO:0032271 | BP | GO:0032271 | regulation of protein polymerization                     | 13/207 | 233/187   | 2.05E-06 | 0.000113 | 8.72E-05 | 13 |

|            |    |            |                                                                         |        |           |          |          |          |    |
|------------|----|------------|-------------------------------------------------------------------------|--------|-----------|----------|----------|----------|----|
| GO:0007015 | BP | GO:0007015 | actin filament organization                                             | 18/207 | 442/187   | 2.18E-06 | 0.000118 | 9.14E-05 | 18 |
| GO:0031334 | BP | GO:0031334 | positive regulation of protein-containing complex assembly              | 13/207 | 237/18723 | 2.47E-06 | 0.000129 | 0.0001   | 13 |
| GO:0120034 | BP | GO:0120034 | positive regulation of plasma membrane bounded cell projection assembly | 9/207  | 105/18723 | 2.49E-06 | 0.000129 | 0.0001   | 9  |
| GO:0032956 | BP | GO:0032956 | regulation of actin cytoskeleton organization                           | 16/207 | 358/18723 | 2.50E-06 | 0.000129 | 0.0001   | 16 |
| GO:0070661 | BP | GO:0070661 | leukocyte proliferation                                                 | 15/207 | 318/187   | 2.70E-06 | 0.000138 | 0.000107 | 15 |
| GO:0070663 | BP | GO:0070663 | regulation of leukocyte proliferation                                   | 13/207 | 245/18723 | 3.56E-06 | 0.000179 | 0.000138 | 13 |
| GO:0045619 | BP | GO:0045619 | regulation of lymphocyte differentiation                                | 11/207 | 174/18723 | 3.86E-06 | 0.000191 | 0.000148 | 11 |
| GO:0002685 | BP | GO:0002685 | regulation of leukocyte migration                                       | 12/207 | 210/187   | 3.99E-06 | 0.000194 | 0.000151 | 12 |
| GO:0046651 | BP | GO:0046651 | lymphocyte proliferation                                                | 14/207 | 288/187   | 4.14E-06 | 0.000199 | 0.000154 | 14 |
| GO:0070371 | BP | GO:0070371 | ERK1 and ERK2 cascade                                                   | 15/207 | 330/187   | 4.24E-06 | 0.000201 | 0.000156 | 15 |
| GO:0032943 | BP | GO:0032943 | mononuclear cell proliferation                                          | 14/207 | 291/187   | 4.67E-06 | 0.000218 | 0.000169 | 14 |
| GO:0030865 | BP | GO:0030865 | cortical cytoskeleton organization                                      | 7/207  | 61/1872   | 4.80E-06 | 0.000218 | 0.000169 | 7  |
| GO:0034113 | BP | GO:0034113 | heterotypic cell-cell adhesion                                          | 7/207  | 61/1872   | 4.80E-06 | 0.000218 | 0.000169 | 7  |
| GO:0042113 | BP | GO:0042113 | B cell activation                                                       | 15/207 | 334/187   | 4.91E-06 | 0.00022  | 0.000171 | 15 |
| GO:0032640 | BP | GO:0032640 | tumor necrosis factor production                                        | 11/207 | 181/187   | 5.64E-06 | 0.000247 | 0.000191 | 11 |
| GO:0032680 | BP | GO:0032680 | regulation of tumor necrosis factor production                          | 11/207 | 181/18723 | 5.64E-06 | 0.000247 | 0.000191 | 11 |
| GO:0051258 | BP | GO:0051258 | protein polymerization                                                  | 14/207 | 297/187   | 5.90E-06 | 0.000255 | 0.000197 | 14 |
| GO:0071706 | BP | GO:0071706 | tumor necrosis factor superfamily cytokine production                   | 11/207 | 186/18723 | 7.32E-06 | 0.000308 | 0.000239 | 11 |
| GO:1903555 | BP | GO:1903555 | regulation of tumor necrosis factor superfamily cytokine production     | 11/207 | 186/18723 | 7.32E-06 | 0.000308 | 0.000239 | 11 |
| GO:0032868 | BP | GO:0032868 | response to insulin                                                     | 13/207 | 264/187   | 8.01E-06 | 0.000332 | 0.000257 | 13 |

|            |    |            |                                                  |        |           |          |          |          |    |
|------------|----|------------|--------------------------------------------------|--------|-----------|----------|----------|----------|----|
| GO:0050670 | BP | GO:0050670 | regulation of lymphocyte proliferation           | 12/207 | 225/18723 | 8.07E-06 | 0.000332 | 0.000257 | 12 |
| GO:0032944 | BP | GO:0032944 | regulation of mononuclear cell proliferation     | 12/207 | 227/18723 | 8.83E-06 | 0.000359 | 0.000278 | 12 |
| GO:0006909 | BP | GO:0006909 | phagocytosis                                     | 14/207 | 308/187   | 8.93E-06 | 0.000359 | 0.000278 | 14 |
| GO:0032970 | BP | GO:0032970 | regulation of actin filament-based process       | 16/207 | 397/18723 | 9.29E-06 | 0.000369 | 0.000285 | 16 |
| GO:0002690 | BP | GO:0002690 | positive regulation of leukocyte chemotaxis      | 8/207  | 94/1872   | 9.62E-06 | 0.000377 | 0.000292 | 8  |
| GO:0046637 | BP | GO:0046637 | regulation of alpha-beta T cell differentiation  | 7/207  | 68/18723  | 9.99E-06 | 0.000387 | 0.0003   | 7  |
| GO:0045123 | BP | GO:0045123 | cellular extravasation                           | 7/207  | 70/1872   | 1.21E-05 | 0.000465 | 0.00036  | 7  |
| GO:0002366 | BP | GO:0002366 | leukocyte activation involved in immune response | 13/207 | 275/18723 | 1.24E-05 | 0.00047  | 0.000364 | 13 |
| GO:0051251 | BP | GO:0051251 | positive regulation of lymphocyte activation     | 15/207 | 362/187   | 1.28E-05 | 0.000482 | 0.000373 | 15 |
| GO:0061515 | BP | GO:0061515 | myeloid cell development                         | 7/207  | 71/1872   | 1.33E-05 | 0.000493 | 0.000382 | 7  |
| GO:0002696 | BP | GO:0002696 | positive regulation of leukocyte activation      | 16/207 | 409/187   | 1.34E-05 | 0.000493 | 0.000382 | 16 |
| GO:0042098 | BP | GO:0042098 | T cell proliferation                             | 11/207 | 199/187   | 1.39E-05 | 0.000503 | 0.00039  | 11 |
| GO:0031341 | BP | GO:0031341 | regulation of cell killing                       | 8/207  | 99/1872   | 1.41E-05 | 0.000503 | 0.00039  | 8  |
| GO:0033628 | BP | GO:0033628 | regulation of cell adhesion mediated by integrin | 6/207  | 48/18723  | 1.42E-05 | 0.000503 | 0.00039  | 6  |
| GO:0002263 | BP | GO:0002263 | cell activation involved in immune response      | 13/207 | 279/18723 | 1.45E-05 | 0.000504 | 0.00039  | 13 |
| GO:1902105 | BP | GO:1902105 | regulation of leukocyte differentiation          | 13/207 | 279/18723 | 1.45E-05 | 0.000504 | 0.00039  | 13 |
| GO:0070085 | BP | GO:0070085 | glycosylation                                    | 12/207 | 240/187   | 1.54E-05 | 0.000533 | 0.000412 | 12 |
| GO:0032869 | BP | GO:0032869 | cellular response to insulin stimulus            | 11/207 | 203/187   | 1.67E-05 | 0.00057  | 0.000441 | 11 |
| GO:0050867 | BP | GO:0050867 | positive regulation of cell activation           | 16/207 | 420/187   | 1.86E-05 | 0.000629 | 0.000487 | 16 |
| GO:0030148 | BP | GO:0030148 | sphingolipid biosynthetic process                | 8/207  | 103/187   | 1.89E-05 | 0.000631 | 0.000489 | 8  |
| GO:0046634 | BP | GO:0046634 | regulation of alpha-beta T cell activation       | 8/207  | 104/187   | 2.02E-05 | 0.000671 | 0.00052  | 8  |
| GO:0042129 | BP | GO:0042129 | regulation of T cell proliferation               | 10/207 | 171/187   | 2.11E-05 | 0.000693 | 0.000537 | 10 |

|            |    |            |                                                    |        |           |          |          |          |    |
|------------|----|------------|----------------------------------------------------|--------|-----------|----------|----------|----------|----|
| GO:0030099 | BP | GO:0030099 | myeloid cell differentiation                       | 15/207 | 381/187   | 2.34E-05 | 0.000759 | 0.000588 | 15 |
| GO:1902903 | BP | GO:1902903 | regulation of supramolecular fiber organization    | 15/207 | 383/18723 | 2.48E-05 | 0.000799 | 0.000619 | 15 |
| GO:0046467 | BP | GO:0046467 | membrane lipid biosynthetic process                | 9/207  | 142/187   | 2.91E-05 | 0.000929 | 0.00072  | 9  |
| GO:0035855 | BP | GO:0035855 | megakaryocyte development                          | 4/207  | 17/1872   | 3.09E-05 | 0.000975 | 0.000755 | 4  |
| GO:0002443 | BP | GO:0002443 | leukocyte mediated immunity                        | 16/207 | 440/187   | 3.27E-05 | 0.001024 | 0.000793 | 16 |
| GO:0002446 | BP | GO:0002446 | neutrophil mediated immunity                       | 5/207  | 34/1872   | 3.37E-05 | 0.001047 | 0.000811 | 5  |
| GO:0007162 | BP | GO:0007162 | negative regulation of cell adhesion               | 13/207 | 303/187   | 3.43E-05 | 0.001048 | 0.000811 | 13 |
| GO:0001910 | BP | GO:0001910 | regulation of leukocyte mediated cytotoxicity      | 7/207  | 82/1873   | 3.44E-05 | 0.001048 | 0.000811 | 7  |
| GO:0030219 | BP | GO:0030219 | megakaryocyte differentiation                      | 6/207  | 57/1872   | 3.85E-05 | 0.001164 | 0.000901 | 6  |
| GO:0097530 | BP | GO:0097530 | granulocyte migration                              | 9/207  | 148/187   | 4.04E-05 | 0.001209 | 0.000936 | 9  |
| GO:0071675 | BP | GO:0071675 | regulation of mononuclear cell migration           | 8/207  | 115/18723 | 4.19E-05 | 0.001236 | 0.000957 | 8  |
| GO:0070372 | BP | GO:0070372 | regulation of ERK1 and ERK2 cascade                | 13/207 | 309/187   | 4.20E-05 | 0.001236 | 0.000957 | 13 |
| GO:0008286 | BP | GO:0008286 | insulin receptor signaling pathway                 | 8/207  | 116/187   | 4.46E-05 | 0.001266 | 0.000981 | 8  |
| GO:0006486 | BP | GO:0006486 | protein glycosylation                              | 11/207 | 226/187   | 4.49E-05 | 0.001266 | 0.000981 | 11 |
| GO:0043413 | BP | GO:0043413 | macromolecule glycosylation                        | 11/207 | 226/187   | 4.49E-05 | 0.001266 | 0.000981 | 11 |
| GO:0070665 | BP | GO:0070665 | positive regulation of leukocyte proliferation     | 9/207  | 150/18723 | 4.49E-05 | 0.001266 | 0.000981 | 9  |
| GO:0042119 | BP | GO:0042119 | neutrophil activation                              | 5/207  | 36/1872   | 4.49E-05 | 0.001266 | 0.000981 | 5  |
| GO:0001776 | BP | GO:0001776 | leukocyte homeostasis                              | 7/207  | 87/1872   | 5.04E-05 | 0.001411 | 0.001093 | 7  |
| GO:0030595 | BP | GO:0030595 | leukocyte chemotaxis                               | 11/207 | 230/187   | 5.26E-05 | 0.001459 | 0.00113  | 11 |
| GO:0032872 | BP | GO:0032872 | regulation of stress-activated MAPK cascade        | 10/207 | 192/18723 | 5.67E-05 | 0.00156  | 0.001208 | 10 |
| GO:0032930 | BP | GO:0032930 | positive regulation of superoxide anion generation | 4/207  | 20/1873   | 6.12E-05 | 0.001655 | 0.001281 | 4  |
| GO:0002285 | BP | GO:0002285 | lymphocyte activation involved in immune response  | 10/207 | 194/18723 | 6.18E-05 | 0.001655 | 0.001281 | 10 |

|            |    |            |                                                                    |        |         |          |          |          |    |
|------------|----|------------|--------------------------------------------------------------------|--------|---------|----------|----------|----------|----|
| GO:0016032 | BP | GO:0016032 | viral process                                                      | 15/207 | 415/187 | 6.20E-05 | 0.001655 | 0.001281 | 15 |
| GO:0002688 | BP | GO:0002688 | regulation of leukocyte chemotaxis                                 | 8/207  | 122/187 | 6.39E-05 | 0.001655 | 0.001281 | 8  |
| GO:1990266 | BP | GO:1990266 | neutrophil migration                                               | 8/207  | 122/187 | 6.39E-05 | 0.001655 | 0.001281 | 8  |
| GO:0002262 | BP | GO:0002262 | myeloid cell homeostasis                                           | 9/207  | 157/187 | 6.40E-05 | 0.001655 | 0.001281 | 9  |
| GO:1902107 | BP | GO:1902107 | positive regulation of leukocyte differentiation                   | 9/207  | 157/23  | 6.40E-05 | 0.001655 | 0.001281 | 9  |
| GO:1903708 | BP | GO:1903708 | positive regulation of hemopoiesis                                 | 9/207  | 157/187 | 6.40E-05 | 0.001655 | 0.001281 | 9  |
| GO:0070302 | BP | GO:0070302 | regulation of stress-activated protein kinase signaling cascade    | 10/207 | 195/23  | 6.46E-05 | 0.001657 | 0.001283 | 10 |
| GO:0051051 | BP | GO:0051051 | negative regulation of transport                                   | 16/207 | 470/187 | 7.16E-05 | 0.001812 | 0.001404 | 16 |
| GO:0001909 | BP | GO:0001909 | leukocyte mediated cytotoxicity                                    | 8/207  | 124/187 | 7.17E-05 | 0.001812 | 0.001404 | 8  |
| GO:0033630 | BP | GO:0033630 | positive regulation of cell adhesion mediated by integrin          | 4/207  | 21/8723 | 7.49E-05 | 0.001881 | 0.001457 | 4  |
| GO:0071621 | BP | GO:0071621 | granulocyte chemotaxis                                             | 8/207  | 125/187 | 7.59E-05 | 0.00189  | 0.001464 | 8  |
| GO:0006487 | BP | GO:0006487 | protein N-linked glycosylation                                     | 6/207  | 65/872  | 8.15E-05 | 0.002002 | 0.00155  | 6  |
| GO:0046513 | BP | GO:0046513 | ceramide biosynthetic process                                      | 6/207  | 65/872  | 8.15E-05 | 0.002002 | 0.00155  | 6  |
| GO:0050764 | BP | GO:0050764 | regulation of phagocytosis                                         | 7/207  | 95/872  | 8.86E-05 | 0.002159 | 0.001672 | 7  |
| GO:0034101 | BP | GO:0034101 | erythrocyte homeostasis                                            | 8/207  | 129/187 | 9.47E-05 | 0.002292 | 0.001775 | 8  |
| GO:0016601 | BP | GO:0016601 | Rac protein signal transduction                                    | 5/207  | 42/872  | 9.60E-05 | 0.002307 | 0.001787 | 5  |
| GO:0002429 | BP | GO:0002429 | immune response-activating cell surface receptor signaling pathway | 12/207 | 291/23  | 0.0001   | 0.002379 | 0.001842 | 12 |
| GO:0002757 | BP | GO:0002757 | immune response-activating signal transduction                     | 12/207 | 291/23  | 0.0001   | 0.002379 | 0.001842 | 12 |
| GO:0001655 | BP | GO:0001655 | urogenital system development                                      | 13/207 | 338/187 | 0.000104 | 0.002453 | 0.0019   | 13 |
| GO:0016266 | BP | GO:0016266 | O-glycan processing                                                | 5/207  | 43/872  | 0.000108 | 0.002486 | 0.001925 | 5  |
| GO:0036230 | BP | GO:0036230 | granulocyte activation                                             | 5/207  | 43/872  | 0.000108 | 0.002486 | 0.001925 | 5  |
| GO:0070301 | BP | GO:0070301 | cellular response to hydrogen peroxide                             | 7/207  | 98/872  | 0.000108 | 0.002486 | 0.001925 | 7  |

|            |    |            |                                                                             |        |           |          |          |          |    |
|------------|----|------------|-----------------------------------------------------------------------------|--------|-----------|----------|----------|----------|----|
| GO:0050765 | BP | GO:0050765 | negative regulation of phagocytosis                                         | 4/207  | 23/1872   | 0.000109 | 0.002496 | 0.001933 | 4  |
| GO:0007219 | BP | GO:0007219 | Notch signaling pathway                                                     | 9/207  | 172/187   | 0.000129 | 0.002889 | 0.002237 | 9  |
| GO:0032528 | BP | GO:0032528 | microvillus organization                                                    | 4/207  | 24/1872   | 0.00013  | 0.002889 | 0.002237 | 4  |
| GO:0032928 | BP | GO:0032928 | regulation of superoxide anion generation                                   | 4/207  | 24/18723  | 0.00013  | 0.002889 | 0.002237 | 4  |
| GO:0090023 | BP | GO:0090023 | positive regulation of neutrophil chemotaxis                                | 4/207  | 24/1872   | 0.00013  | 0.002889 | 0.002237 | 4  |
| GO:0042102 | BP | GO:0042102 | positive regulation of T cell proliferation                                 | 7/207  | 101/187   | 0.00013  | 0.002889 | 0.002237 | 7  |
| GO:0030217 | BP | GO:0030217 | T cell differentiation                                                      | 11/207 | 257/187   | 0.000141 | 0.003111 | 0.002409 | 11 |
| GO:0050671 | BP | GO:0050671 | positive regulation of lymphocyte proliferation                             | 8/207  | 137/18723 | 0.000144 | 0.003151 | 0.00244  | 8  |
| GO:0030593 | BP | GO:0030593 | neutrophil chemotaxis                                                       | 7/207  | 103/187   | 0.000147 | 0.003204 | 0.002481 | 7  |
| GO:0007157 | BP | GO:0007157 | heterophilic cell-cell adhesion via plasma membrane cell adhesion molecules | 5/207  | 46/18723  | 0.000149 | 0.003204 | 0.002481 | 5  |
| GO:0043300 | BP | GO:0043300 | regulation of leukocyte degranulation                                       | 5/207  | 46/18723  | 0.000149 | 0.003204 | 0.002481 | 5  |
| GO:2000601 | BP | GO:2000601 | positive regulation of Arp2/3 complex-mediated actin nucleation             | 3/207  | 10/18723  | 0.000151 | 0.003211 | 0.002487 | 3  |
| GO:0032946 | BP | GO:0032946 | positive regulation of mononuclear cell proliferation                       | 8/207  | 138/18723 | 0.000151 | 0.003211 | 0.002487 | 8  |
| GO:0045621 | BP | GO:0045621 | positive regulation of lymphocyte differentiation                           | 7/207  | 104/18723 | 0.000157 | 0.003299 | 0.002555 | 7  |
| GO:0007163 | BP | GO:0007163 | establishment or maintenance of cell polarity                               | 10/207 | 218/18723 | 0.000162 | 0.003395 | 0.00263  | 10 |
| GO:0032008 | BP | GO:0032008 | positive regulation of TOR signaling                                        | 5/207  | 47/1872   | 0.000166 | 0.003445 | 0.002668 | 5  |
| GO:0034341 | BP | GO:0034341 | response to interferon-gamma                                                | 8/207  | 141/187   | 0.000176 | 0.003612 | 0.002798 | 8  |
| GO:0050921 | BP | GO:0050921 | positive regulation of chemotaxis                                           | 8/207  | 141/187   | 0.000176 | 0.003612 | 0.002798 | 8  |
| GO:0043409 | BP | GO:0043409 | negative regulation of MAPK cascade                                         | 9/207  | 180/187   | 0.000182 | 0.003711 | 0.002874 | 9  |
| GO:1901653 | BP | GO:1901653 | cellular response to peptide                                                | 13/207 | 359/187   | 0.000189 | 0.003839 | 0.002973 | 13 |

|            |    |            |                                                                                             |        |           |          |          |          |    |
|------------|----|------------|---------------------------------------------------------------------------------------------|--------|-----------|----------|----------|----------|----|
| GO:0002274 | BP | GO:000274  | myeloid leukocyte activation                                                                | 10/207 | 223/187   | 0.000195 | 0.003936 | 0.003048 | 10 |
| GO:0006054 | BP | GO:0006054 | N-acetylneuraminic acid metabolic process                                                   | 3/207  | 11/1872   | 0.000206 | 0.004059 | 0.003144 | 3  |
| GO:0043312 | BP | GO:0043312 | neutrophil degranulation                                                                    | 3/207  | 11/1872   | 0.000206 | 0.004059 | 0.003144 | 3  |
| GO:0046643 | BP | GO:0046643 | regulation of gamma-delta T cell activation                                                 | 3/207  | 11/18723  | 0.000206 | 0.004059 | 0.003144 | 3  |
| GO:0002433 | BP | GO:0002433 | immune response-regulating cell surface receptor signaling pathway involved in phagocytosis | 4/207  | 27/18723  | 0.000209 | 0.004059 | 0.003144 | 4  |
| GO:0038096 | BP | GO:0038096 | Fc-gamma receptor signaling pathway involved in phagocytosis                                | 4/207  | 27/18723  | 0.000209 | 0.004059 | 0.003144 | 4  |
| GO:0071624 | BP | GO:0071624 | positive regulation of granulocyte chemotaxis                                               | 4/207  | 27/18723  | 0.000209 | 0.004059 | 0.003144 | 4  |
| GO:0002768 | BP | GO:0002768 | immune response-regulating cell surface receptor signaling pathway                          | 12/207 | 315/18723 | 0.00021  | 0.004059 | 0.003144 | 12 |
| GO:0031589 | BP | GO:0031589 | cell-substrate adhesion                                                                     | 13/207 | 363/187   | 0.000211 | 0.004059 | 0.003144 | 13 |
| GO:0002698 | BP | GO:0002698 | negative regulation of immune effector process                                              | 7/207  | 110/18723 | 0.000222 | 0.004207 | 0.003258 | 7  |
| GO:0009101 | BP | GO:0009101 | glycoprotein biosynthetic process                                                           | 12/207 | 317/187   | 0.000223 | 0.004207 | 0.003258 | 12 |
| GO:0060337 | BP | GO:0060337 | type I interferon signaling pathway                                                         | 5/207  | 50/1872   | 0.000223 | 0.004207 | 0.003258 | 5  |
| GO:0045580 | BP | GO:0045580 | regulation of T cell differentiation                                                        | 8/207  | 146/187   | 0.000223 | 0.004207 | 0.003258 | 8  |
| GO:0038094 | BP | GO:0038094 | Fc-gamma receptor signaling pathway                                                         | 4/207  | 28/1872   | 0.000241 | 0.004488 | 0.003475 | 4  |
| GO:1902624 | BP | GO:1902624 | positive regulation of neutrophil migration                                                 | 4/207  | 28/1872   | 0.000241 | 0.004488 | 0.003475 | 4  |
| GO:0071496 | BP | GO:0071496 | cellular response to external stimulus                                                      | 12/207 | 320/187   | 0.000243 | 0.004488 | 0.003475 | 12 |
| GO:0043370 | BP | GO:0043370 | regulation of CD4-positive, alpha-beta T cell differentiation                               | 5/207  | 51/18723  | 0.000245 | 0.004488 | 0.003475 | 5  |
| GO:0071622 | BP | GO:0071622 | regulation of granulocyte chemotaxis                                                        | 5/207  | 51/18723  | 0.000245 | 0.004488 | 0.003475 | 5  |
| GO:0046632 | BP | GO:0046632 | alpha-beta T cell differentiation                                                           | 7/207  | 112/187   | 0.000248 | 0.004525 | 0.003504 | 7  |

|            |    |            |                                                                                                                                                  |        |           |          |          |          |    |
|------------|----|------------|--------------------------------------------------------------------------------------------------------------------------------------------------|--------|-----------|----------|----------|----------|----|
| GO:0001906 | BP | GO:0001906 | cell killing                                                                                                                                     | 9/207  | 188/187   | 0.000251 | 0.004559 | 0.003531 | 9  |
| GO:0071357 | BP | GO:0071357 | cellular response to type I interferon                                                                                                           | 5/207  | 52/1872   | 0.000268 | 0.004843 | 0.00375  | 5  |
| GO:0072683 | BP | GO:0072683 | T cell extravasation                                                                                                                             | 3/207  | 12/1872   | 0.000272 | 0.004865 | 0.003767 | 3  |
| GO:1902563 | BP | GO:1902563 | regulation of neutrophil activation                                                                                                              | 3/207  | 12/1872   | 0.000272 | 0.004865 | 0.003767 | 3  |
| GO:0002253 | BP | GO:0002253 | activation of immune response                                                                                                                    | 13/207 | 375/187   | 0.000288 | 0.005124 | 0.003968 | 13 |
| GO:0008625 | BP | GO:0008625 | extrinsic apoptotic signaling pathway via death domain receptors                                                                                 | 6/207  | 82/18723  | 0.000296 | 0.005231 | 0.004051 | 6  |
| GO:0032103 | BP | GO:0032103 | positive regulation of response to external stimulus                                                                                             | 14/207 | 427/18723 | 0.000298 | 0.005249 | 0.004065 | 14 |
| GO:0045577 | BP | GO:0045577 | regulation of B cell differentiation                                                                                                             | 4/207  | 30/1872   | 0.000317 | 0.005557 | 0.004303 | 4  |
| GO:0002823 | BP | GO:0002823 | negative regulation of adaptive immune response based on somatic recombination of immune receptors built from immunoglobulin superfamily domains | 5/207  | 54/18723  | 0.000321 | 0.005582 | 0.004323 | 5  |
| GO:0006665 | BP | GO:0006665 | sphingolipid metabolic process                                                                                                                   | 8/207  | 155/187   | 0.000335 | 0.00577  | 0.004468 | 8  |
| GO:0034614 | BP | GO:0034614 | cellular response to reactive oxygen species                                                                                                     | 8/207  | 155/18723 | 0.000335 | 0.00577  | 0.004468 | 8  |
| GO:0051403 | BP | GO:0051403 | stress-activated MAPK cascade                                                                                                                    | 10/207 | 239/187   | 0.000339 | 0.00582  | 0.004507 | 10 |
| GO:0071346 | BP | GO:0071346 | cellular response to interferon-gamma                                                                                                            | 7/207  | 118/187   | 0.000341 | 0.005824 | 0.00451  | 7  |
| GO:0046631 | BP | GO:0046631 | alpha-beta T cell activation                                                                                                                     | 8/207  | 156/187   | 0.00035  | 0.005873 | 0.004548 | 8  |
| GO:0036462 | BP | GO:0036462 | TRAIL-activated apoptotic signaling pathway                                                                                                      | 3/207  | 13/18723  | 0.000351 | 0.005873 | 0.004548 | 3  |
| GO:0042492 | BP | GO:0042492 | gamma-delta T cell differentiation                                                                                                               | 3/207  | 13/1872   | 0.000351 | 0.005873 | 0.004548 | 3  |
| GO:0070486 | BP | GO:0070486 | leukocyte aggregation                                                                                                                            | 3/207  | 13/1872   | 0.000351 | 0.005873 | 0.004548 | 3  |
| GO:0030218 | BP | GO:0030218 | erythrocyte differentiation                                                                                                                      | 7/207  | 120/187   | 0.000378 | 0.006293 | 0.004873 | 7  |
| GO:0002886 | BP | GO:0002886 | regulation of myeloid leukocyte mediated immunity                                                                                                | 5/207  | 56/18723  | 0.00038  | 0.006301 | 0.00488  | 5  |

|            |    |            |                                                                                                                                         |        |           |          |          |          |    |
|------------|----|------------|-----------------------------------------------------------------------------------------------------------------------------------------|--------|-----------|----------|----------|----------|----|
| GO:0071375 | BP | GO:0071375 | cellular response to peptide hormone stimulus                                                                                           | 11/207 | 290/18723 | 0.000399 | 0.006578 | 0.005095 | 11 |
| GO:0090022 | BP | GO:0090022 | regulation of neutrophil chemotaxis                                                                                                     | 4/207  | 32/872    | 0.000409 | 0.006718 | 0.005203 | 4  |
| GO:0031098 | BP | GO:0031098 | stress-activated protein kinase signaling cascade                                                                                       | 10/207 | 247/18723 | 0.00044  | 0.007168 | 0.005551 | 10 |
| GO:0006643 | BP | GO:0006643 | membrane lipid metabolic process                                                                                                        | 9/207  | 203/187   | 0.000441 | 0.007168 | 0.005551 | 9  |
| GO:0003376 | BP | GO:0003376 | sphingosine-1-phosphate receptor signaling pathway                                                                                      | 3/207  | 14/8723   | 0.000443 | 0.007168 | 0.005551 | 3  |
| GO:0034340 | BP | GO:0034340 | response to type I interferon                                                                                                           | 5/207  | 58/872    | 0.000448 | 0.007215 | 0.005587 | 5  |
| GO:0032496 | BP | GO:0032496 | response to lipopolysaccharide                                                                                                          | 12/207 | 343/187   | 0.000454 | 0.007272 | 0.005632 | 12 |
| GO:0002431 | BP | GO:0002431 | Fc receptor mediated stimulatory signaling pathway                                                                                      | 4/207  | 33/8723   | 0.000462 | 0.007367 | 0.005705 | 4  |
| GO:0060348 | BP | GO:0060348 | bone development                                                                                                                        | 9/207  | 205/187   | 0.000474 | 0.007522 | 0.005825 | 9  |
| GO:0002820 | BP | GO:0002820 | negative regulation of adaptive immune response                                                                                         | 5/207  | 59/8723   | 0.000485 | 0.007668 | 0.005938 | 5  |
| GO:2001235 | BP | GO:2001235 | positive regulation of apoptotic signaling pathway                                                                                      | 7/207  | 126/18723 | 0.000507 | 0.007981 | 0.006181 | 7  |
| GO:0045582 | BP | GO:0045582 | positive regulation of T cell differentiation                                                                                           | 6/207  | 91/872    | 0.000519 | 0.008088 | 0.006264 | 6  |
| GO:0098751 | BP | GO:0098751 | bone cell development                                                                                                                   | 4/207  | 34/872    | 0.000519 | 0.008088 | 0.006264 | 4  |
| GO:0051127 | BP | GO:0051127 | positive regulation of actin nucleation                                                                                                 | 3/207  | 15/872    | 0.000549 | 0.008485 | 0.006571 | 3  |
| GO:0072075 | BP | GO:0072075 | metanephric mesenchyme development                                                                                                      | 3/207  | 15/8723   | 0.000549 | 0.008485 | 0.006571 | 3  |
| GO:0072001 | BP | GO:0072001 | renal system development                                                                                                                | 11/207 | 302/187   | 0.00056  | 0.00861  | 0.006668 | 11 |
| GO:0050866 | BP | GO:0050866 | negative regulation of cell activation                                                                                                  | 9/207  | 210/187   | 0.000564 | 0.00863  | 0.006683 | 9  |
| GO:0002706 | BP | GO:0002706 | regulation of lymphocyte mediated immunity                                                                                              | 8/207  | 168/18723 | 0.000573 | 0.008687 | 0.006727 | 8  |
| GO:0002822 | BP | GO:0002822 | regulation of adaptive immune response based on somatic recombination of immune receptors built from immunoglobulin superfamily domains | 8/207  | 168/18723 | 0.000573 | 0.008687 | 0.006727 | 8  |

|            |    |            |                                                            |        |           |          |          |          |    |
|------------|----|------------|------------------------------------------------------------|--------|-----------|----------|----------|----------|----|
| GO:2001233 | BP | GO:2001233 | regulation of apoptotic signaling pathway                  | 12/207 | 356/18723 | 0.000631 | 0.009523 | 0.007375 | 12 |
| GO:0045089 | BP | GO:0045089 | positive regulation of innate immune response              | 7/207  | 131/18723 | 0.00064  | 0.009578 | 0.007417 | 7  |
| GO:0050853 | BP | GO:0050853 | B cell receptor signaling pathway                          | 7/207  | 131/187   | 0.00064  | 0.009578 | 0.007417 | 7  |
| GO:0060338 | BP | GO:0060338 | regulation of type I interferon-mediated signaling pathway | 4/207  | 36/18723  | 0.000648 | 0.009578 | 0.007417 | 4  |
| GO:0090322 | BP | GO:0090322 | regulation of superoxide metabolic process                 | 4/207  | 36/18723  | 0.000648 | 0.009578 | 0.007417 | 4  |
| GO:0032479 | BP | GO:0032479 | regulation of type I interferon production                 | 6/207  | 95/1872   | 0.000652 | 0.009578 | 0.007417 | 6  |
| GO:0032606 | BP | GO:0032606 | type I interferon production                               | 6/207  | 95/1872   | 0.000652 | 0.009578 | 0.007417 | 6  |
| GO:0002704 | BP | GO:0002704 | negative regulation of leukocyte mediated immunity         | 5/207  | 63/18723  | 0.000657 | 0.009578 | 0.007417 | 5  |
| GO:0031343 | BP | GO:0031343 | positive regulation of cell killing                        | 5/207  | 63/1872   | 0.000657 | 0.009578 | 0.007417 | 5  |
| GO:0007569 | BP | GO:0007569 | cell aging                                                 | 7/207  | 132/187   | 0.00067  | 0.009578 | 0.007417 | 7  |
| GO:0002693 | BP | GO:0002693 | positive regulation of cellular extravasation              | 3/207  | 16/1872   | 0.000671 | 0.009578 | 0.007417 | 3  |
| GO:0030033 | BP | GO:0030033 | microvillus assembly                                       | 3/207  | 16/1872   | 0.000671 | 0.009578 | 0.007417 | 3  |
| GO:0071732 | BP | GO:0071732 | cellular response to nitric oxide                          | 3/207  | 16/1872   | 0.000671 | 0.009578 | 0.007417 | 3  |
| GO:0090520 | BP | GO:0090520 | sphingolipid mediated signaling pathway                    | 3/207  | 16/18723  | 0.000671 | 0.009578 | 0.007417 | 3  |
| GO:0030888 | BP | GO:0030888 | regulation of B cell proliferation                         | 5/207  | 64/1872   | 0.000707 | 0.01001  | 0.007752 | 5  |
| GO:1900076 | BP | GO:1900076 | regulation of cellular response to insulin stimulus        | 5/207  | 64/18723  | 0.000707 | 0.01001  | 0.007752 | 5  |
| GO:0043434 | BP | GO:0043434 | response to peptide hormone                                | 13/207 | 414/187   | 0.000731 | 0.010316 | 0.007989 | 13 |
| GO:0045088 | BP | GO:0045088 | regulation of innate immune response                       | 9/207  | 218/187   | 0.000737 | 0.01034  | 0.008008 | 9  |
| GO:0002764 | BP | GO:0002764 | immune response-regulating signaling pathway               | 14/207 | 468/18723 | 0.000739 | 0.01034  | 0.008008 | 14 |
| GO:0002237 | BP | GO:0002237 | response to molecule of bacterial origin                   | 12/207 | 363/187   | 0.000748 | 0.010415 | 0.008066 | 12 |
| GO:0071677 | BP | GO:0071677 | positive regulation of mononuclear cell migration          | 5/207  | 65/18723  | 0.000759 | 0.01053  | 0.008154 | 5  |

|            |    |            |                                                          |        |           |          |          |          |    |
|------------|----|------------|----------------------------------------------------------|--------|-----------|----------|----------|----------|----|
| GO:003537  | BP | GO:003537  | fatty-acyl-CoA metabolic process                         | 4/207  | 38/1872   | 0.000798 | 0.010979 | 0.008503 | 4  |
| GO:1903305 | BP | GO:1903305 | regulation of regulated secretory pathway                | 7/207  | 136/18723 | 0.0008   | 0.010979 | 0.008503 | 7  |
| GO:0072673 | BP | GO:0072673 | lamellipodium morphogenesis                              | 3/207  | 17/1872   | 0.000808 | 0.010979 | 0.008503 | 3  |
| GO:0002444 | BP | GO:0002444 | myeloid leukocyte mediated immunity                      | 6/207  | 99/1872   | 0.000811 | 0.010979 | 0.008503 | 6  |
| GO:0042100 | BP | GO:0042100 | B cell proliferation                                     | 6/207  | 99/1872   | 0.000811 | 0.010979 | 0.008503 | 6  |
| GO:0046626 | BP | GO:0046626 | regulation of insulin receptor signaling pathway         | 5/207  | 66/18723  | 0.000814 | 0.010979 | 0.008503 | 5  |
| GO:0072678 | BP | GO:0072678 | T cell migration                                         | 5/207  | 66/1872   | 0.000814 | 0.010979 | 0.008503 | 5  |
| GO:0019058 | BP | GO:0019058 | viral life cycle                                         | 11/207 | 317/187   | 0.000835 | 0.011193 | 0.008668 | 11 |
| GO:0035265 | BP | GO:0035265 | organ growth                                             | 8/207  | 178/187   | 0.000836 | 0.011193 | 0.008668 | 8  |
| GO:0046635 | BP | GO:0046635 | positive regulation of alpha-beta T cell activation      | 5/207  | 67/18723  | 0.000872 | 0.011533 | 0.008932 | 5  |
| GO:2000514 | BP | GO:2000514 | regulation of CD4-positive, alpha-beta T cell activation | 5/207  | 67/18723  | 0.000872 | 0.011533 | 0.008932 | 5  |
| GO:0072594 | BP | GO:0072594 | establishment of protein localization to organelle       | 13/207 | 422/18723 | 0.000872 | 0.011533 | 0.008932 | 13 |
| GO:0048608 | BP | GO:0048608 | reproductive structure development                       | 13/207 | 424/18723 | 0.00091  | 0.011995 | 0.00929  | 13 |
| GO:0043410 | BP | GO:0043410 | positive regulation of MAPK cascade                      | 14/207 | 480/187   | 0.000943 | 0.012383 | 0.00959  | 14 |
| GO:0006672 | BP | GO:0006672 | ceramide metabolic process                               | 6/207  | 102/187   | 0.000948 | 0.012396 | 0.0096   | 6  |
| GO:0002283 | BP | GO:0002283 | neutrophil activation involved in immune response        | 3/207  | 18/18723  | 0.000962 | 0.01243  | 0.009627 | 3  |
| GO:1902170 | BP | GO:1902170 | cellular response to reactive nitrogen species           | 3/207  | 18/18723  | 0.000962 | 0.01243  | 0.009627 | 3  |
| GO:2000641 | BP | GO:2000641 | regulation of early endosome to late endosome transport  | 3/207  | 18/18723  | 0.000962 | 0.01243  | 0.009627 | 3  |
| GO:0061458 | BP | GO:0061458 | reproductive system development                          | 13/207 | 427/187   | 0.000971 | 0.012461 | 0.009651 | 13 |
| GO:0030866 | BP | GO:0030866 | cortical actin cytoskeleton organization                 | 4/207  | 40/18723  | 0.000971 | 0.012461 | 0.009651 | 4  |
| GO:0018108 | BP | GO:0018108 | peptidyl-tyrosine phosphorylation                        | 12/207 | 375/187   | 0.000991 | 0.012662 | 0.009806 | 12 |

|            |    |            |                                                                              |        |           |          |          |          |    |
|------------|----|------------|------------------------------------------------------------------------------|--------|-----------|----------|----------|----------|----|
| GO:0032760 | BP | GO:0032760 | positive regulation of tumor necrosis factor production                      | 6/207  | 103/18723 | 0.000997 | 0.012694 | 0.009831 | 6  |
| GO:0002819 | BP | GO:0002819 | regulation of adaptive immune response                                       | 8/207  | 183/187   | 0.001    | 0.012694 | 0.009831 | 8  |
| GO:0032006 | BP | GO:0032006 | regulation of TOR signaling                                                  | 6/207  | 104/187   | 0.001049 | 0.013259 | 0.010268 | 6  |
| GO:0018212 | BP | GO:0018212 | peptidyl-tyrosine modification                                               | 12/207 | 378/187   | 0.001061 | 0.013357 | 0.010344 | 12 |
| GO:1902622 | BP | GO:1902622 | regulation of neutrophil migration                                           | 4/207  | 41/872    | 0.001067 | 0.013388 | 0.010368 | 4  |
| GO:0002683 | BP | GO:0002683 | negative regulation of immune system process                                 | 13/207 | 434/18723 | 0.001124 | 0.013873 | 0.010744 | 13 |
| GO:0014067 | BP | GO:0014067 | negative regulation of phosphatidylinositol 3-kinase signaling               | 3/207  | 19/8723   | 0.001133 | 0.013873 | 0.010744 | 3  |
| GO:0030011 | BP | GO:0030011 | maintenance of cell polarity                                                 | 3/207  | 19/872    | 0.001133 | 0.013873 | 0.010744 | 3  |
| GO:0030220 | BP | GO:0030220 | platelet formation                                                           | 3/207  | 19/872    | 0.001133 | 0.013873 | 0.010744 | 3  |
| GO:0036344 | BP | GO:0036344 | platelet morphogenesis                                                       | 3/207  | 19/872    | 0.001133 | 0.013873 | 0.010744 | 3  |
| GO:0072074 | BP | GO:0072074 | kidney mesenchyme development                                                | 3/207  | 19/872    | 0.001133 | 0.013873 | 0.010744 | 3  |
| GO:0150116 | BP | GO:0150116 | regulation of cell-substrate junction organization                           | 5/207  | 71/8723   | 0.001134 | 0.013873 | 0.010744 | 5  |
| GO:0002695 | BP | GO:0002695 | negative regulation of leukocyte activation                                  | 8/207  | 187/187   | 0.00115  | 0.014013 | 0.010852 | 8  |
| GO:0046620 | BP | GO:0046620 | regulation of organ growth                                                   | 6/207  | 106/187   | 0.001158 | 0.014065 | 0.010892 | 6  |
| GO:0006040 | BP | GO:0006040 | amino sugar metabolic process                                                | 4/207  | 42/872    | 0.001169 | 0.014101 | 0.01092  | 4  |
| GO:0030890 | BP | GO:0030890 | positive regulation of B cell proliferation                                  | 4/207  | 42/872    | 0.001169 | 0.014101 | 0.01092  | 4  |
| GO:0007160 | BP | GO:0007160 | cell-matrix adhesion                                                         | 9/207  | 233/187   | 0.001177 | 0.014144 | 0.010954 | 9  |
| GO:0006470 | BP | GO:0006470 | protein dephosphorylation                                                    | 10/207 | 281/187   | 0.001183 | 0.014169 | 0.010973 | 10 |
| GO:0042542 | BP | GO:0042542 | response to hydrogen peroxide                                                | 7/207  | 146/187   | 0.001211 | 0.014406 | 0.011157 | 7  |
| GO:0007229 | BP | GO:0007229 | integrin-mediated signaling pathway                                          | 6/207  | 107/187   | 0.001216 | 0.014406 | 0.011157 | 6  |
| GO:1903557 | BP | GO:1903557 | positive regulation of tumor necrosis factor superfamily cytokine production | 6/207  | 107/18723 | 0.001216 | 0.014406 | 0.011157 | 6  |
| GO:0043299 | BP | GO:0043299 | leukocyte degranulation                                                      | 5/207  | 73/872    | 0.001285 | 0.015178 | 0.011755 | 5  |

|            |    |            |                                                        |        |           |          |          |          |    |
|------------|----|------------|--------------------------------------------------------|--------|-----------|----------|----------|----------|----|
| GO:0009100 | BP | GO:0009100 | glycoprotein metabolic process                         | 12/207 | 387/187   | 0.001296 | 0.015251 | 0.011811 | 12 |
| GO:0032986 | BP | GO:0032986 | protein-DNA complex disassembly                        | 3/207  | 20/1872   | 0.001322 | 0.015342 | 0.011882 | 3  |
| GO:0046629 | BP | GO:0046629 | gamma-delta T cell activation                          | 3/207  | 20/1872   | 0.001322 | 0.015342 | 0.011882 | 3  |
| GO:0071731 | BP | GO:0071731 | response to nitric oxide                               | 3/207  | 20/1872   | 0.001322 | 0.015342 | 0.011882 | 3  |
| GO:0097503 | BP | GO:0097503 | sialylation                                            | 3/207  | 20/1872   | 0.001322 | 0.015342 | 0.011882 | 3  |
| GO:0002456 | BP | GO:0002456 | T cell mediated immunity                               | 6/207  | 109/187   | 0.001338 | 0.015476 | 0.011985 | 6  |
| GO:0032386 | BP | GO:0032386 | regulation of intracellular transport                  | 11/207 | 337/187   | 0.001366 | 0.015753 | 0.012199 | 11 |
| GO:0042554 | BP | GO:0042554 | superoxide anion generation                            | 4/207  | 44/1872   | 0.001394 | 0.016017 | 0.012404 | 4  |
| GO:0001959 | BP | GO:0001959 | regulation of cytokine-mediated signaling pathway      | 7/207  | 150/18723 | 0.001416 | 0.016217 | 0.012559 | 7  |
| GO:0097193 | BP | GO:0097193 | intrinsic apoptotic signaling pathway                  | 10/207 | 288/187   | 0.001422 | 0.016229 | 0.012568 | 10 |
| GO:0007568 | BP | GO:0007568 | aging                                                  | 11/207 | 339/187   | 0.001432 | 0.016291 | 0.012616 | 11 |
| GO:0050851 | BP | GO:0050851 | antigen receptor-mediated signaling pathway            | 9/207  | 240/18723 | 0.001445 | 0.016384 | 0.012688 | 9  |
| GO:0034504 | BP | GO:0034504 | protein localization to nucleus                        | 10/207 | 290/187   | 0.001497 | 0.016915 | 0.013099 | 10 |
| GO:0034315 | BP | GO:0034315 | regulation of Arp2/3 complex-mediated actin nucleation | 3/207  | 21/18723  | 0.001529 | 0.017208 | 0.013327 | 3  |
| GO:0032609 | BP | GO:0032609 | interferon-gamma production                            | 6/207  | 112/187   | 0.001538 | 0.017208 | 0.013327 | 6  |
| GO:0032649 | BP | GO:0032649 | regulation of interferon-gamma production              | 6/207  | 112/18723 | 0.001538 | 0.017208 | 0.013327 | 6  |
| GO:0022408 | BP | GO:0022408 | negative regulation of cell-cell adhesion              | 8/207  | 196/187   | 0.00155  | 0.017293 | 0.013392 | 8  |
| GO:0001822 | BP | GO:0001822 | kidney development                                     | 10/207 | 293/187   | 0.001615 | 0.017955 | 0.013905 | 10 |
| GO:2000107 | BP | GO:2000107 | negative regulation of leukocyte apoptotic process     | 4/207  | 46/18723  | 0.001647 | 0.01825  | 0.014134 | 4  |
| GO:0002286 | BP | GO:0002286 | T cell activation involved in immune response          | 6/207  | 114/18723 | 0.001683 | 0.018594 | 0.0144   | 6  |
| GO:0006606 | BP | GO:0006606 | protein import into nucleus                            | 7/207  | 155/187   | 0.001709 | 0.018726 | 0.014502 | 7  |
| GO:0031668 | BP | GO:0031668 | cellular response to extracellular stimulus            | 9/207  | 246/187   | 0.001712 | 0.018726 | 0.014502 | 9  |

|            |    |            |                                                                                |       |          |          |          |          |   |
|------------|----|------------|--------------------------------------------------------------------------------|-------|----------|----------|----------|----------|---|
| GO:0071216 | BP | GO:0071216 | cellular response to biotic stimulus                                           | 9/207 | 246/187  | 0.001712 | 0.018726 | 0.014502 | 9 |
| GO:0070373 | BP | GO:0070373 | negative regulation of ERK1 and ERK2 cascade                                   | 5/207 | 78/18723 | 0.001728 | 0.018842 | 0.014592 | 5 |
| GO:0032069 | BP | GO:0032069 | regulation of nuclease activity                                                | 3/207 | 22/1872  | 0.001757 | 0.018971 | 0.014692 | 3 |
| GO:0043371 | BP | GO:0043371 | negative regulation of CD4-positive, alpha-beta T cell differentiation         | 3/207 | 22/18723 | 0.001757 | 0.018971 | 0.014692 | 3 |
| GO:0046628 | BP | GO:0046628 | positive regulation of insulin receptor signaling pathway                      | 3/207 | 22/18723 | 0.001757 | 0.018971 | 0.014692 | 3 |
| GO:0045646 | BP | GO:0045646 | regulation of erythrocyte differentiation                                      | 4/207 | 47/18723 | 0.001785 | 0.019216 | 0.014881 | 4 |
| GO:0018107 | BP | GO:0018107 | peptidyl-threonine phosphorylation                                             | 6/207 | 116/187  | 0.001839 | 0.019678 | 0.01524  | 6 |
| GO:0043200 | BP | GO:0043200 | response to amino acid                                                         | 6/207 | 116/187  | 0.001839 | 0.019678 | 0.01524  | 6 |
| GO:0032388 | BP | GO:0032388 | positive regulation of intracellular transport                                 | 8/207 | 202/187  | 0.001874 | 0.019989 | 0.01548  | 8 |
| GO:0072676 | BP | GO:0072676 | lymphocyte migration                                                           | 6/207 | 117/187  | 0.001921 | 0.020426 | 0.015819 | 6 |
| GO:2001238 | BP | GO:2001238 | positive regulation of extrinsic apoptotic signaling pathway                   | 4/207 | 48/18723 | 0.00193  | 0.020461 | 0.015846 | 4 |
| GO:0051170 | BP | GO:0051170 | import into nucleus                                                            | 7/207 | 159/187  | 0.001976 | 0.020875 | 0.016166 | 7 |
| GO:0018279 | BP | GO:0018279 | protein N-linked glycosylation via asparagine                                  | 3/207 | 23/18723 | 0.002004 | 0.021041 | 0.016295 | 3 |
| GO:1903306 | BP | GO:1903306 | negative regulation of regulated secretory pathway                             | 3/207 | 23/18723 | 0.002004 | 0.021041 | 0.016295 | 3 |
| GO:2000106 | BP | GO:2000106 | regulation of leukocyte apoptotic process                                      | 5/207 | 81/18723 | 0.002042 | 0.021378 | 0.016556 | 5 |
| GO:0035088 | BP | GO:0035088 | establishment or maintenance of apical/basal cell polarity                     | 4/207 | 49/18723 | 0.002084 | 0.021619 | 0.016743 | 4 |
| GO:0061245 | BP | GO:0061245 | establishment or maintenance of bipolar cell polarity                          | 4/207 | 49/18723 | 0.002084 | 0.021619 | 0.016743 | 4 |
| GO:1902041 | BP | GO:1902041 | regulation of extrinsic apoptotic signaling pathway via death domain receptors | 4/207 | 49/18723 | 0.002084 | 0.021619 | 0.016743 | 4 |
| GO:0017038 | BP | GO:0017038 | protein import                                                                 | 8/207 | 206/187  | 0.002118 | 0.021906 | 0.016965 | 8 |

|            |    |            |                                                                          |       |           |          |          |          |   |
|------------|----|------------|--------------------------------------------------------------------------|-------|-----------|----------|----------|----------|---|
| GO:0002312 | BP | GO:0002312 | B cell activation involved in immune response                            | 5/207 | 82/18723  | 0.002155 | 0.022225 | 0.017212 | 5 |
| GO:0060759 | BP | GO:0060759 | regulation of response to cytokine stimulus                              | 7/207 | 162/18723 | 0.002196 | 0.022574 | 0.017482 | 7 |
| GO:0038093 | BP | GO:0038093 | Fc receptor signaling pathway                                            | 4/207 | 50/1872   | 0.002246 | 0.022881 | 0.01772  | 4 |
| GO:0046638 | BP | GO:0046638 | positive regulation of alpha-beta T cell differentiation                 | 4/207 | 50/18723  | 0.002246 | 0.022881 | 0.01772  | 4 |
| GO:1901570 | BP | GO:1901570 | fatty acid derivative biosynthetic process                               | 4/207 | 50/1872   | 0.002246 | 0.022881 | 0.01772  | 4 |
| GO:0001779 | BP | GO:0001779 | natural killer cell differentiation                                      | 3/207 | 24/1872   | 0.002271 | 0.022955 | 0.017777 | 3 |
| GO:0018196 | BP | GO:0018196 | peptidyl-asparagine modification                                         | 3/207 | 24/1872   | 0.002271 | 0.022955 | 0.017777 | 3 |
| GO:0043367 | BP | GO:0043367 | CD4-positive, alpha-beta T cell differentiation                          | 5/207 | 83/18723  | 0.002273 | 0.022955 | 0.017777 | 5 |
| GO:0071222 | BP | GO:0071222 | cellular response to lipopolysaccharide                                  | 8/207 | 209/187   | 0.002317 | 0.023326 | 0.018064 | 8 |
| GO:0045637 | BP | GO:0045637 | regulation of myeloid cell differentiation                               | 8/207 | 210/187   | 0.002386 | 0.023954 | 0.018551 | 8 |
| GO:0032873 | BP | GO:0032873 | negative regulation of stress-activated MAPK cascade                     | 4/207 | 51/18723  | 0.002416 | 0.024112 | 0.018674 | 4 |
| GO:0070303 | BP | GO:0070303 | negative regulation of stress-activated protein kinase signaling cascade | 4/207 | 51/18723  | 0.002416 | 0.024112 | 0.018674 | 4 |
| GO:0032635 | BP | GO:0032635 | interleukin-6 production                                                 | 7/207 | 165/187   | 0.002435 | 0.024155 | 0.018707 | 7 |
| GO:0032675 | BP | GO:0032675 | regulation of interleukin-6 production                                   | 7/207 | 165/18723 | 0.002435 | 0.024155 | 0.018707 | 7 |
| GO:0030168 | BP | GO:0030168 | platelet activation                                                      | 6/207 | 123/187   | 0.002472 | 0.024384 | 0.018884 | 6 |
| GO:0050852 | BP | GO:0050852 | T cell receptor signaling pathway                                        | 6/207 | 123/187   | 0.002472 | 0.024384 | 0.018884 | 6 |
| GO:0002709 | BP | GO:0002709 | regulation of T cell mediated immunity                                   | 5/207 | 85/1872   | 0.002523 | 0.024817 | 0.019219 | 5 |
| GO:0035336 | BP | GO:0035336 | long-chain fatty-acyl-CoA metabolic process                              | 3/207 | 25/18723  | 0.00256  | 0.024966 | 0.019334 | 3 |
| GO:0046949 | BP | GO:0046949 | fatty-acyl-CoA biosynthetic process                                      | 3/207 | 25/1872   | 0.00256  | 0.024966 | 0.019334 | 3 |
| GO:1900078 | BP | GO:1900078 | positive regulation of cellular response to insulin stimulus             | 3/207 | 25/18723  | 0.00256  | 0.024966 | 0.019334 | 3 |
| GO:0043277 | BP | GO:0043277 | apoptotic cell clearance                                                 | 4/207 | 52/1872   | 0.002595 | 0.025235 | 0.019543 | 4 |

|            |    |            |                                                          |        |         |          |          |          |    |
|------------|----|------------|----------------------------------------------------------|--------|---------|----------|----------|----------|----|
| GO:0006493 | BP | GO:0006493 | protein O-linked glycosylation                           | 5/207  | 86/872  | 0.002655 | 0.025637 | 0.019855 | 5  |
| GO:0022406 | BP | GO:0022406 | membrane docking                                         | 5/207  | 86/872  | 0.002655 | 0.025637 | 0.019855 | 5  |
| GO:0042060 | BP | GO:0042060 | wound healing                                            | 12/207 | 422/187 | 0.002659 | 0.025637 | 0.019855 | 12 |
| GO:0018210 | BP | GO:0018210 | peptidyl-threonine modification                          | 6/207  | 125/187 | 0.00268  | 0.025762 | 0.019951 | 6  |
| GO:0002833 | BP | GO:0002833 | positive regulation of response to biotic stimulus       | 7/207  | 168/187 | 0.002693 | 0.025818 | 0.019994 | 7  |
| GO:0018105 | BP | GO:0018105 | peptidyl-serine phosphorylation                          | 10/207 | 315/187 | 0.002735 | 0.026147 | 0.020249 | 10 |
| GO:0050730 | BP | GO:0050730 | regulation of peptidyl-tyrosine phosphorylation          | 9/207  | 264/187 | 0.002757 | 0.026284 | 0.020355 | 9  |
| GO:0002707 | BP | GO:0002707 | negative regulation of lymphocyte mediated immunity      | 4/207  | 53/872  | 0.002783 | 0.026434 | 0.020472 | 4  |
| GO:0031929 | BP | GO:0031929 | TOR signaling                                            | 6/207  | 126/187 | 0.002788 | 0.026434 | 0.020472 | 6  |
| GO:0046639 | BP | GO:0046639 | negative regulation of alpha-beta T cell differentiation | 3/207  | 26/872  | 0.002871 | 0.027141 | 0.021019 | 3  |
| GO:0070374 | BP | GO:0070374 | positive regulation of ERK1 and ERK2 cascade             | 8/207  | 217/187 | 0.002919 | 0.027506 | 0.021302 | 8  |
| GO:0031331 | BP | GO:0031331 | positive regulation of cellular catabolic process        | 12/207 | 427/187 | 0.002926 | 0.027506 | 0.021302 | 12 |
| GO:0070228 | BP | GO:0070228 | regulation of lymphocyte apoptotic process               | 4/207  | 54/872  | 0.00298  | 0.027942 | 0.02164  | 4  |
| GO:2001020 | BP | GO:2001020 | regulation of response to DNA damage stimulus            | 8/207  | 219/187 | 0.003087 | 0.028868 | 0.022357 | 8  |
| GO:0034109 | BP | GO:0034109 | homotypic cell-cell adhesion                             | 5/207  | 90/872  | 0.003234 | 0.030077 | 0.023292 | 5  |
| GO:0035304 | BP | GO:0035304 | regulation of protein dephosphorylation                  | 5/207  | 90/872  | 0.003234 | 0.030077 | 0.023292 | 5  |
| GO:0010810 | BP | GO:0010810 | regulation of cell-substrate adhesion                    | 8/207  | 221/187 | 0.003263 | 0.030179 | 0.023372 | 8  |
| GO:0071219 | BP | GO:0071219 | cellular response to molecule of bacterial origin        | 8/207  | 221/187 | 0.003263 | 0.030179 | 0.023372 | 8  |
| GO:0000302 | BP | GO:0000302 | response to reactive oxygen species                      | 8/207  | 222/187 | 0.003353 | 0.030933 | 0.023956 | 8  |
| GO:0002275 | BP | GO:0002275 | myeloid cell activation involved in immune response      | 5/207  | 91/872  | 0.003392 | 0.030965 | 0.023981 | 5  |
| GO:0050878 | BP | GO:0050878 | regulation of body fluid levels                          | 11/207 | 379/187 | 0.003397 | 0.030965 | 0.023981 | 11 |

|            |    |            |                                                           |        |           |          |          |          |    |
|------------|----|------------|-----------------------------------------------------------|--------|-----------|----------|----------|----------|----|
| GO:0001912 | BP | GO:0001912 | positive regulation of leukocyte mediated cytotoxicity    | 4/207  | 56/18723  | 0.003402 | 0.030965 | 0.023981 | 4  |
| GO:0032608 | BP | GO:0032608 | interferon-beta production                                | 4/207  | 56/1872   | 0.003402 | 0.030965 | 0.023981 | 4  |
| GO:0032648 | BP | GO:0032648 | regulation of interferon-beta production                  | 4/207  | 56/18723  | 0.003402 | 0.030965 | 0.023981 | 4  |
| GO:0050920 | BP | GO:0050920 | regulation of chemotaxis                                  | 8/207  | 223/187   | 0.003446 | 0.03128  | 0.024225 | 8  |
| GO:0002313 | BP | GO:0002313 | mature B cell differentiation involved in immune response | 3/207  | 28/18723  | 0.003559 | 0.032044 | 0.024816 | 3  |
| GO:0090344 | BP | GO:0090344 | negative regulation of cell aging                         | 3/207  | 28/1872   | 0.003559 | 0.032044 | 0.024816 | 3  |
| GO:1903649 | BP | GO:1903649 | regulation of cytoplasmic transport                       | 3/207  | 28/1872   | 0.003559 | 0.032044 | 0.024816 | 3  |
| GO:0002831 | BP | GO:0002831 | regulation of response to biotic stimulus                 | 10/207 | 327/18723 | 0.003568 | 0.032044 | 0.024816 | 10 |
| GO:0061756 | BP | GO:0061756 | leukocyte adhesion to vascular endothelial cell           | 4/207  | 57/18723  | 0.003628 | 0.032498 | 0.025168 | 4  |
| GO:0090398 | BP | GO:0090398 | cellular senescence                                       | 5/207  | 93/1872   | 0.003724 | 0.033275 | 0.025769 | 5  |
| GO:0071241 | BP | GO:0071241 | cellular response to inorganic substance                  | 8/207  | 226/187   | 0.003736 | 0.03329  | 0.025781 | 8  |
| GO:0002705 | BP | GO:0002705 | positive regulation of leukocyte mediated immunity        | 6/207  | 134/18723 | 0.00378  | 0.033595 | 0.026017 | 6  |
| GO:0048638 | BP | GO:0048638 | regulation of developmental growth                        | 10/207 | 330/18723 | 0.003805 | 0.033727 | 0.026119 | 10 |
| GO:0010043 | BP | GO:0010043 | response to zinc ion                                      | 4/207  | 58/1872   | 0.003863 | 0.034072 | 0.026386 | 4  |
| GO:0032481 | BP | GO:0032481 | positive regulation of type I interferon production       | 4/207  | 58/18723  | 0.003863 | 0.034072 | 0.026386 | 4  |
| GO:0001738 | BP | GO:0001738 | morphogenesis of a polarized epithelium                   | 5/207  | 94/1872   | 0.003899 | 0.034296 | 0.02656  | 5  |
| GO:0001101 | BP | GO:0001101 | response to acid chemical                                 | 6/207  | 135/187   | 0.00392  | 0.034393 | 0.026636 | 6  |
| GO:0019082 | BP | GO:0019082 | viral protein processing                                  | 3/207  | 29/1872   | 0.003938 | 0.034459 | 0.026687 | 3  |
| GO:0033157 | BP | GO:0033157 | regulation of intracellular protein transport             | 8/207  | 229/18723 | 0.004044 | 0.035299 | 0.027337 | 8  |
| GO:0008593 | BP | GO:0008593 | regulation of Notch signaling pathway                     | 5/207  | 95/1872   | 0.004079 | 0.035516 | 0.027505 | 5  |
| GO:0006979 | BP | GO:0006979 | response to oxidative stress                              | 12/207 | 446/187   | 0.004142 | 0.035975 | 0.027861 | 12 |

|            |    |            |                                                                                                             |        |           |          |          |          |    |
|------------|----|------------|-------------------------------------------------------------------------------------------------------------|--------|-----------|----------|----------|----------|----|
| GO:0045471 | BP | GO:0045471 | response to ethanol                                                                                         | 6/207  | 137/187   | 0.004212 | 0.036486 | 0.028256 | 6  |
| GO:1901655 | BP | GO:1901655 | cellular response to ketone                                                                                 | 5/207  | 96/872    | 0.004266 | 0.036856 | 0.028543 | 5  |
| GO:0010800 | BP | GO:0010800 | positive regulation of peptidyl-threonine phosphorylation                                                   | 3/207  | 30/8723   | 0.00434  | 0.037216 | 0.028822 | 3  |
| GO:0051125 | BP | GO:0051125 | regulation of actin nucleation                                                                              | 3/207  | 30/872    | 0.00434  | 0.037216 | 0.028822 | 3  |
| GO:0070229 | BP | GO:0070229 | negative regulation of lymphocyte apoptotic process                                                         | 3/207  | 30/8723   | 0.00434  | 0.037216 | 0.028822 | 3  |
| GO:0018209 | BP | GO:0018209 | peptidyl-serine modification                                                                                | 10/207 | 338/187   | 0.004497 | 0.03847  | 0.029793 | 10 |
| GO:0002699 | BP | GO:0002699 | positive regulation of immune effector process                                                              | 8/207  | 235/18723 | 0.004719 | 0.040265 | 0.031183 | 8  |
| GO:0001782 | BP | GO:0001782 | B cell homeostasis                                                                                          | 3/207  | 31/872    | 0.004766 | 0.040364 | 0.03126  | 3  |
| GO:0008045 | BP | GO:0008045 | motor neuron axon guidance                                                                                  | 3/207  | 31/872    | 0.004766 | 0.040364 | 0.03126  | 3  |
| GO:0090183 | BP | GO:0090183 | regulation of kidney development                                                                            | 3/207  | 31/872    | 0.004766 | 0.040364 | 0.03126  | 3  |
| GO:0002260 | BP | GO:0002260 | lymphocyte homeostasis                                                                                      | 4/207  | 62/872    | 0.004909 | 0.041165 | 0.03188  | 4  |
| GO:0032613 | BP | GO:0032613 | interleukin-10 production                                                                                   | 4/207  | 62/872    | 0.004909 | 0.041165 | 0.03188  | 4  |
| GO:0032653 | BP | GO:0032653 | regulation of interleukin-10 production                                                                     | 4/207  | 62/8723   | 0.004909 | 0.041165 | 0.03188  | 4  |
| GO:0045428 | BP | GO:0045428 | regulation of nitric oxide biosynthetic process                                                             | 4/207  | 62/8723   | 0.004909 | 0.041165 | 0.03188  | 4  |
| GO:0007346 | BP | GO:0007346 | regulation of mitotic cell cycle                                                                            | 12/207 | 457/187   | 0.005015 | 0.041951 | 0.032488 | 12 |
| GO:0061640 | BP | GO:0061640 | cytoskeleton-dependent cytokinesis                                                                          | 5/207  | 100/187   | 0.005071 | 0.042262 | 0.032729 | 5  |
| GO:0001865 | BP | GO:0001865 | NK T cell differentiation                                                                                   | 2/207  | 10/872    | 0.005164 | 0.042262 | 0.032729 | 2  |
| GO:0001915 | BP | GO:0001915 | negative regulation of T cell mediated cytotoxicity                                                         | 2/207  | 10/8723   | 0.005164 | 0.042262 | 0.032729 | 2  |
| GO:0002291 | BP | GO:0002291 | T cell activation via T cell receptor contact with antigen bound to MHC molecule on antigen presenting cell | 2/207  | 10/8723   | 0.005164 | 0.042262 | 0.032729 | 2  |
| GO:0019062 | BP | GO:0019062 | virion attachment to host cell                                                                              | 2/207  | 10/872    | 0.005164 | 0.042262 | 0.032729 | 2  |

|            |    |            |                                                                        |        |           |          |          |          |    |
|------------|----|------------|------------------------------------------------------------------------|--------|-----------|----------|----------|----------|----|
| GO:0030953 | BP | GO:0030953 | astral microtubule organization                                        | 2/207  | 10/1872   | 0.005164 | 0.042262 | 0.032729 | 2  |
| GO:0032070 | BP | GO:0032070 | regulation of deoxyribonuclease activity                               | 2/207  | 10/1873   | 0.005164 | 0.042262 | 0.032729 | 2  |
| GO:0060368 | BP | GO:0060368 | regulation of Fc receptor mediated stimulatory signaling pathway       | 2/207  | 10/1873   | 0.005164 | 0.042262 | 0.032729 | 2  |
| GO:1902946 | BP | GO:1902946 | protein localization to early endosome                                 | 2/207  | 10/1872   | 0.005164 | 0.042262 | 0.032729 | 2  |
| GO:0050854 | BP | GO:0050854 | regulation of antigen receptor-mediated signaling pathway              | 4/207  | 63/1873   | 0.005197 | 0.042393 | 0.032831 | 4  |
| GO:0043372 | BP | GO:0043372 | positive regulation of CD4-positive, alpha-beta T cell differentiation | 3/207  | 32/1873   | 0.005217 | 0.042393 | 0.032831 | 3  |
| GO:2000515 | BP | GO:2000515 | negative regulation of CD4-positive, alpha-beta T cell activation      | 3/207  | 32/1873   | 0.005217 | 0.042393 | 0.032831 | 3  |
| GO:0150115 | BP | GO:0150115 | cell-substrate junction organization                                   | 5/207  | 101/187   | 0.005289 | 0.042875 | 0.033204 | 5  |
| GO:0001885 | BP | GO:0001885 | endothelial cell development                                           | 4/207  | 64/1872   | 0.005497 | 0.044349 | 0.034346 | 4  |
| GO:0080164 | BP | GO:0080164 | regulation of nitric oxide metabolic process                           | 4/207  | 64/1873   | 0.005497 | 0.044349 | 0.034346 | 4  |
| GO:0035710 | BP | GO:0035710 | CD4-positive, alpha-beta T cell activation                             | 5/207  | 102/187   | 0.005512 | 0.044373 | 0.034364 | 5  |
| GO:0016570 | BP | GO:0016570 | histone modification                                                   | 12/207 | 463/187   | 0.005549 | 0.044565 | 0.034512 | 12 |
| GO:0002335 | BP | GO:0002335 | mature B cell differentiation                                          | 3/207  | 33/1872   | 0.005692 | 0.045392 | 0.035154 | 3  |
| GO:0034110 | BP | GO:0034110 | regulation of homotypic cell-cell adhesion                             | 3/207  | 33/1873   | 0.005692 | 0.045392 | 0.035154 | 3  |
| GO:0045920 | BP | GO:0045920 | negative regulation of exocytosis                                      | 3/207  | 33/1872   | 0.005692 | 0.045392 | 0.035154 | 3  |
| GO:0002449 | BP | GO:0002449 | lymphocyte mediated immunity                                           | 10/207 | 350/187   | 0.005719 | 0.045501 | 0.035237 | 10 |
| GO:0045639 | BP | GO:0045639 | positive regulation of myeloid cell differentiation                    | 5/207  | 103/18723 | 0.005743 | 0.045582 | 0.035301 | 5  |
| GO:0045453 | BP | GO:0045453 | bone resorption                                                        | 4/207  | 65/1872   | 0.005807 | 0.045986 | 0.035613 | 4  |
| GO:0050777 | BP | GO:0050777 | negative regulation of immune response                                 | 7/207  | 194/187   | 0.005908 | 0.046677 | 0.036148 | 7  |
| GO:0033674 | BP | GO:0033674 | positive regulation of kinase activity                                 | 12/207 | 467/187   | 0.00593  | 0.046743 | 0.036199 | 12 |

|                |    |                |                                                                                              |            |                   |          |          |          |    |
|----------------|----|----------------|----------------------------------------------------------------------------------------------|------------|-------------------|----------|----------|----------|----|
| GO:00313<br>46 | BP | GO:0031<br>346 | positive regulation of cell projection organization                                          | 10/<br>207 | 353/<br>187<br>23 | 0.006062 | 0.047308 | 0.036637 | 10 |
| GO:20010<br>56 | BP | GO:2001<br>056 | positive regulation of cysteine-type endopeptidase activity                                  | 6/2<br>07  | 148/<br>187<br>23 | 0.006113 | 0.047308 | 0.036637 | 6  |
| GO:00025<br>62 | BP | GO:0002<br>562 | somatic diversification of immune receptors via germline recombination within a single locus | 4/2<br>07  | 66/<br>872<br>3   | 0.006129 | 0.047308 | 0.036637 | 4  |
| GO:00164<br>44 | BP | GO:0016<br>444 | somatic cell DNA recombination                                                               | 4/2<br>07  | 66/<br>872        | 0.006129 | 0.047308 | 0.036637 | 4  |
| GO:00507<br>66 | BP | GO:0050<br>766 | positive regulation of phagocytosis                                                          | 4/2<br>07  | 66/<br>872        | 0.006129 | 0.047308 | 0.036637 | 4  |
| GO:00518<br>93 | BP | GO:0051<br>893 | regulation of focal adhesion assembly                                                        | 4/2<br>07  | 66/<br>872        | 0.006129 | 0.047308 | 0.036637 | 4  |
| GO:00901<br>09 | BP | GO:0090<br>109 | regulation of cell-substrate junction assembly                                               | 4/2<br>07  | 66/<br>872<br>3   | 0.006129 | 0.047308 | 0.036637 | 4  |
| GO:00443<br>19 | BP | GO:0044<br>319 | wound healing, spreading of cells                                                            | 3/2<br>07  | 34/<br>872        | 0.006193 | 0.047308 | 0.036637 | 3  |
| GO:00905<br>05 | BP | GO:0090<br>505 | epiboly involved in wound healing                                                            | 3/2<br>07  | 34/<br>872        | 0.006193 | 0.047308 | 0.036637 | 3  |
| GO:20010<br>22 | BP | GO:2001<br>022 | positive regulation of response to DNA damage stimulus                                       | 5/2<br>07  | 105/<br>187<br>23 | 0.006224 | 0.047308 | 0.036637 | 5  |
| GO:00310<br>32 | BP | GO:0031<br>032 | actomyosin structure organization                                                            | 7/2<br>07  | 196/<br>187       | 0.00624  | 0.047308 | 0.036637 | 7  |
| GO:00350<br>90 | BP | GO:0035<br>090 | maintenance of apical/basal cell polarity                                                    | 2/2<br>07  | 11/<br>872<br>3   | 0.006265 | 0.047308 | 0.036637 | 2  |
| GO:00354<br>57 | BP | GO:0035<br>457 | cellular response to interferon-alpha                                                        | 2/2<br>07  | 11/<br>872        | 0.006265 | 0.047308 | 0.036637 | 2  |
| GO:00451<br>99 | BP | GO:0045<br>199 | maintenance of epithelial cell apical/basal polarity                                         | 2/2<br>07  | 11/<br>872<br>3   | 0.006265 | 0.047308 | 0.036637 | 2  |
| GO:00456<br>54 | BP | GO:0045<br>654 | positive regulation of megakaryocyte differentiation                                         | 2/2<br>07  | 11/<br>872<br>3   | 0.006265 | 0.047308 | 0.036637 | 2  |
| GO:00465<br>01 | BP | GO:0046<br>501 | protoporphyrinogen IX metabolic process                                                      | 2/2<br>07  | 11/<br>872        | 0.006265 | 0.047308 | 0.036637 | 2  |
| GO:00480<br>96 | BP | GO:0048<br>096 | chromatin-mediated maintenance of transcription                                              | 2/2<br>07  | 11/<br>872<br>3   | 0.006265 | 0.047308 | 0.036637 | 2  |
| GO:00607<br>46 | BP | GO:0060<br>746 | parental behavior                                                                            | 2/2<br>07  | 11/<br>872        | 0.006265 | 0.047308 | 0.036637 | 2  |
| GO:19056<br>68 | BP | GO:1905<br>668 | positive regulation of protein localization to endosome                                      | 2/2<br>07  | 11/<br>872<br>3   | 0.006265 | 0.047308 | 0.036637 | 2  |

|            |    |            |                                                                                                                           |        |           |          |          |          |    |
|------------|----|------------|---------------------------------------------------------------------------------------------------------------------------|--------|-----------|----------|----------|----------|----|
| GO:0002460 | BP | GO:0002460 | adaptive immune response based on somatic recombination of immune receptors built from immunoglobulin superfamily domains | 10/207 | 356/18723 | 0.00642  | 0.048372 | 0.037461 | 10 |
| GO:0070527 | BP | GO:0070527 | platelet aggregation                                                                                                      | 4/207  | 67/1872   | 0.006463 | 0.04846  | 0.037529 | 4  |
| GO:0042116 | BP | GO:0042116 | macrophage activation                                                                                                     | 5/207  | 106/187   | 0.006475 | 0.04846  | 0.037529 | 5  |
| GO:0071887 | BP | GO:0071887 | leukocyte apoptotic process                                                                                               | 5/207  | 106/187   | 0.006475 | 0.04846  | 0.037529 | 5  |
| GO:0001818 | BP | GO:0001818 | negative regulation of cytokine production                                                                                | 10/207 | 357/187   | 0.006543 | 0.048868 | 0.037845 | 10 |
| GO:0050864 | BP | GO:0050864 | regulation of B cell activation                                                                                           | 7/207  | 198/187   | 0.006585 | 0.049071 | 0.038002 | 7  |
| GO:0031667 | BP | GO:0031667 | response to nutrient levels                                                                                               | 12/207 | 474/187   | 0.006646 | 0.04942  | 0.038273 | 12 |
| GO:0046640 | BP | GO:0046640 | regulation of alpha-beta T cell proliferation                                                                             | 3/207  | 35/18723  | 0.006719 | 0.049465 | 0.038307 | 3  |
| GO:0048821 | BP | GO:0048821 | erythrocyte development                                                                                                   | 3/207  | 35/1872   | 0.006719 | 0.049465 | 0.038307 | 3  |
| GO:0071108 | BP | GO:0071108 | protein K48-linked deubiquitination                                                                                       | 3/207  | 35/1872   | 0.006719 | 0.049465 | 0.038307 | 3  |
| GO:0090504 | BP | GO:0090504 | epiboly                                                                                                                   | 3/207  | 35/1872   | 0.006719 | 0.049465 | 0.038307 | 3  |
| GO:2001236 | BP | GO:2001236 | regulation of extrinsic apoptotic signaling pathway                                                                       | 6/207  | 151/18723 | 0.006725 | 0.049465 | 0.038307 | 6  |
| GO:0051052 | BP | GO:0051052 | regulation of DNA metabolic process                                                                                       | 10/207 | 359/187   | 0.006795 | 0.049875 | 0.038625 | 10 |
| GO:0005747 | CC | GO:0005747 | mitochondrial respiratory chain complex I                                                                                 | 13/216 | 48/19550  | 3.49E-15 | 3.76E-13 | 2.89E-13 | 13 |
| GO:0030964 | CC | GO:0030964 | NADH dehydrogenase complex                                                                                                | 13/216 | 48/19550  | 3.49E-15 | 3.76E-13 | 2.89E-13 | 13 |
| GO:0045271 | CC | GO:0045271 | respiratory chain complex I                                                                                               | 13/216 | 48/1955   | 3.49E-15 | 3.76E-13 | 2.89E-13 | 13 |
| GO:0070469 | CC | GO:0070469 | respirasome                                                                                                               | 15/216 | 100/195   | 3.03E-13 | 2.45E-11 | 1.88E-11 | 15 |
| GO:0005746 | CC | GO:0005746 | mitochondrial respirasome                                                                                                 | 14/216 | 89/1955   | 9.73E-13 | 6.14E-11 | 4.73E-11 | 14 |
| GO:0098803 | CC | GO:0098803 | respiratory chain complex                                                                                                 | 14/216 | 90/1955   | 1.14E-12 | 6.14E-11 | 4.73E-11 | 14 |
| GO:1990204 | CC | GO:1990204 | oxidoreductase complex                                                                                                    | 13/216 | 112/195   | 3.31E-10 | 1.53E-08 | 1.17E-08 | 13 |

|            |    |            |                                              |        |           |          |          |          |    |
|------------|----|------------|----------------------------------------------|--------|-----------|----------|----------|----------|----|
| GO:0098800 | CC | GO:0098800 | inner mitochondrial membrane protein complex | 14/216 | 147/19550 | 9.68E-10 | 3.91E-08 | 3.01E-08 | 14 |
| GO:0005925 | CC | GO:0005925 | focal adhesion                               | 21/216 | 418/195   | 8.56E-09 | 3.07E-07 | 2.36E-07 | 21 |
| GO:0030055 | CC | GO:0030055 | cell-substrate junction                      | 21/216 | 425/195   | 1.14E-08 | 3.69E-07 | 2.84E-07 | 21 |
| GO:0005743 | CC | GO:0005743 | mitochondrial inner membrane                 | 22/216 | 495/195   | 3.37E-08 | 9.89E-07 | 7.61E-07 | 22 |
| GO:0031209 | CC | GO:0031209 | SCAR complex                                 | 5/216  | 12/1955   | 1.17E-07 | 3.15E-06 | 2.42E-06 | 5  |
| GO:0030027 | CC | GO:0030027 | lamellipodium                                | 13/216 | 202/195   | 4.11E-07 | 1.02E-05 | 7.85E-06 | 13 |
| GO:0101002 | CC | GO:0101002 | ficolin-1-rich granule                       | 12/216 | 185/195   | 1.06E-06 | 2.45E-05 | 1.89E-05 | 12 |
| GO:0098798 | CC | GO:0098798 | mitochondrial protein-containing complex     | 14/216 | 268/19550 | 1.80E-06 | 3.88E-05 | 2.98E-05 | 14 |
| GO:0030667 | CC | GO:0030667 | secretory granule membrane                   | 14/216 | 311/195   | 1.00E-05 | 0.000202 | 0.000155 | 14 |
| GO:0070820 | CC | GO:0070820 | tertiary granule                             | 10/216 | 164/195   | 1.47E-05 | 0.000279 | 0.000215 | 10 |
| GO:0031252 | CC | GO:0031252 | cell leading edge                            | 16/216 | 422/195   | 1.98E-05 | 0.000356 | 0.000274 | 16 |
| GO:0030175 | CC | GO:0030175 | filopodium                                   | 8/216  | 107/195   | 2.49E-05 | 0.000423 | 0.000326 | 8  |
| GO:0016514 | CC | GO:0016514 | SWI/SNF complex                              | 4/216  | 19/1955   | 4.93E-05 | 0.000796 | 0.000613 | 4  |
| GO:1902495 | CC | GO:1902495 | transmembrane transporter complex            | 14/216 | 366/195   | 6.01E-05 | 0.000924 | 0.000711 | 14 |
| GO:0005902 | CC | GO:0005902 | microvillus                                  | 7/216  | 91/1955   | 6.73E-05 | 0.000987 | 0.000759 | 7  |
| GO:0098562 | CC | GO:0098562 | cytoplasmic side of membrane                 | 10/216 | 197/195   | 7.04E-05 | 0.000988 | 0.00076  | 10 |
| GO:1990351 | CC | GO:1990351 | transporter complex                          | 14/216 | 381/195   | 9.21E-05 | 0.001187 | 0.000913 | 14 |
| GO:0045121 | CC | GO:0045121 | membrane raft                                | 13/216 | 335/195   | 9.55E-05 | 0.001187 | 0.000913 | 13 |
| GO:0098857 | CC | GO:0098857 | membrane microdomain                         | 13/216 | 335/195   | 9.55E-05 | 0.001187 | 0.000913 | 13 |
| GO:0009898 | CC | GO:0009898 | cytoplasmic side of plasma membrane          | 9/216  | 172/195   | 0.000129 | 0.001541 | 0.001185 | 9  |
| GO:0035861 | CC | GO:0035861 | site of double-strand break                  | 6/216  | 73/1955   | 0.000156 | 0.001737 | 0.001336 | 6  |
| GO:0070821 | CC | GO:0070821 | tertiary granule membrane                    | 6/216  | 73/1955   | 0.000156 | 0.001737 | 0.001336 | 6  |
| GO:0098858 | CC | GO:0098858 | actin-based cell projection                  | 10/216 | 221/195   | 0.000181 | 0.001951 | 0.001501 | 10 |
| GO:0031528 | CC | GO:0031528 | microvillus membrane                         | 4/216  | 27/1955   | 0.000208 | 0.002171 | 0.00167  | 4  |

|            |    |            |                                                            |            |                   |          |          |          |    |
|------------|----|------------|------------------------------------------------------------|------------|-------------------|----------|----------|----------|----|
| GO:0071564 | CC | GO:0071564 | npBAF complex                                              | 3/2<br>16  | 12/1<br>955       | 0.000272 | 0.002712 | 0.002086 | 3  |
| GO:0002102 | CC | GO:0002102 | podosome                                                   | 4/2<br>16  | 29/1<br>955       | 0.000277 | 0.002712 | 0.002086 | 4  |
| GO:1990907 | CC | GO:1990907 | beta-catenin-TCF complex                                   | 3/2<br>16  | 13/1<br>955       | 0.000351 | 0.00333  | 0.002561 | 3  |
| GO:0042581 | CC | GO:0042581 | specific granule                                           | 8/2<br>16  | 160/<br>195       | 0.000414 | 0.003819 | 0.002937 | 8  |
| GO:1904813 | CC | GO:1904813 | ficolin-1-rich granule lumen                               | 7/2<br>16  | 124/<br>195       | 0.00046  | 0.004131 | 0.003177 | 7  |
| GO:0035579 | CC | GO:0035579 | specific granule membrane                                  | 6/2<br>16  | 91/1<br>955       | 0.000518 | 0.004522 | 0.003478 | 6  |
| GO:0071565 | CC | GO:0071565 | nBAF complex                                               | 3/2<br>16  | 15/1<br>955       | 0.000549 | 0.004664 | 0.003587 | 3  |
| GO:0101003 | CC | GO:0101003 | ficolin-1-rich granule membrane                            | 5/2<br>16  | 61/1<br>955       | 0.000566 | 0.004685 | 0.003603 | 5  |
| GO:0090734 | CC | GO:0090734 | site of DNA damage                                         | 6/2<br>16  | 97/1<br>955       | 0.000727 | 0.005871 | 0.004515 | 6  |
| GO:0032433 | CC | GO:0032433 | filopodium tip                                             | 3/2<br>16  | 17/1<br>955       | 0.000807 | 0.006355 | 0.004888 | 3  |
| GO:0034774 | CC | GO:0034774 | secretory granule lumen                                    | 11/<br>216 | 322/<br>195       | 0.000948 | 0.00729  | 0.005607 | 11 |
| GO:0060205 | CC | GO:0060205 | cytoplasmic vesicle lumen                                  | 11/<br>216 | 325/<br>195       | 0.001022 | 0.007675 | 0.005903 | 11 |
| GO:0031983 | CC | GO:0031983 | vesicle lumen                                              | 11/<br>216 | 327/<br>195       | 0.001074 | 0.007881 | 0.006061 | 11 |
| GO:0001772 | CC | GO:0001772 | immunological synapse                                      | 4/2<br>16  | 44/1<br>955       | 0.001392 | 0.00999  | 0.007683 | 4  |
| GO:0005884 | CC | GO:0005884 | actin filament                                             | 6/2<br>16  | 114/<br>195       | 0.001681 | 0.011804 | 0.009078 | 6  |
| GO:0097197 | CC | GO:0097197 | tetraspanin-enriched microdomain                           | 2/2<br>16  | 10/1<br>955       | 0.005158 | 0.035446 | 0.027262 | 2  |
| GO:0031234 | CC | GO:0031234 | extrinsic component of cytoplasmic side of plasma membrane | 5/2<br>16  | 101/<br>195<br>50 | 0.005281 | 0.035535 | 0.02733  | 5  |
| GO:0002178 | CC | GO:0002178 | palmitoyltransferase complex                               | 2/2<br>16  | 11/1<br>955       | 0.006258 | 0.041253 | 0.031728 | 2  |
| GO:0005759 | CC | GO:0005759 | mitochondrial matrix                                       | 12/<br>216 | 480/<br>195       | 0.00731  | 0.045437 | 0.034946 | 12 |
| GO:0005938 | CC | GO:0005938 | cell cortex                                                | 9/2<br>16  | 308/<br>195       | 0.007448 | 0.045437 | 0.034946 | 9  |
| GO:0018995 | CC | GO:0018995 | host cellular component                                    | 2/2<br>16  | 12/1<br>955       | 0.007456 | 0.045437 | 0.034946 | 2  |
| GO:0043657 | CC | GO:0043657 | host cell                                                  | 2/2<br>16  | 12/1<br>955       | 0.007456 | 0.045437 | 0.034946 | 2  |
| GO:0070603 | CC | GO:0070603 | SWI/SNF superfamily-type complex                           | 4/2<br>16  | 72/1<br>955<br>0  | 0.008301 | 0.049568 | 0.038123 | 4  |
| GO:1904949 | CC | GO:1904949 | ATPase complex                                             | 4/2<br>16  | 73/1<br>955       | 0.008708 | 0.049568 | 0.038123 | 4  |

|            |    |            |                                                                                     |            |                   |          |          |          |    |
|------------|----|------------|-------------------------------------------------------------------------------------|------------|-------------------|----------|----------|----------|----|
| GO:0001931 | CC | GO:0001931 | uropod                                                                              | 2/2<br>16  | 13/1<br>955       | 0.008747 | 0.049568 | 0.038123 | 2  |
| GO:0031254 | CC | GO:0031254 | cell trailing edge                                                                  | 2/2<br>16  | 13/1<br>955       | 0.008747 | 0.049568 | 0.038123 | 2  |
| GO:0003954 | MF | GO:0003954 | NADH dehydrogenase activity                                                         | 13/<br>212 | 45/1<br>836<br>8  | 2.35E-15 | 1.02E-12 | 8.41E-13 | 13 |
| GO:0008137 | MF | GO:0008137 | NADH dehydrogenase (ubiquinone) activity                                            | 12/<br>212 | 42/1<br>836<br>8  | 3.34E-14 | 6.59E-12 | 5.46E-12 | 12 |
| GO:0050136 | MF | GO:0050136 | NADH dehydrogenase (quinone) activity                                               | 12/<br>212 | 43/1<br>836<br>8  | 4.58E-14 | 6.59E-12 | 5.46E-12 | 12 |
| GO:0003955 | MF | GO:0003955 | NAD(P)H dehydrogenase (quinone) activity                                            | 12/<br>212 | 45/1<br>836<br>8  | 8.42E-14 | 9.09E-12 | 7.53E-12 | 12 |
| GO:0015453 | MF | GO:0015453 | oxidoreduction-driven active transmembrane transporter activity                     | 13/<br>212 | 72/1<br>836<br>8  | 1.74E-12 | 1.32E-10 | 1.09E-10 | 13 |
| GO:0016655 | MF | GO:0016655 | oxidoreductase activity, acting on NAD(P)H, quinone or similar compound as acceptor | 12/<br>212 | 57/1<br>836<br>8  | 1.83E-12 | 1.32E-10 | 1.09E-10 | 12 |
| GO:0016651 | MF | GO:0016651 | oxidoreductase activity, acting on NAD(P)H                                          | 13/<br>212 | 88/1<br>836<br>8  | 2.50E-11 | 1.54E-09 | 1.28E-09 | 13 |
| GO:0009055 | MF | GO:0009055 | electron transfer activity                                                          | 14/<br>212 | 126/<br>183       | 2.14E-10 | 1.16E-08 | 9.57E-09 | 14 |
| GO:0003712 | MF | GO:0003712 | transcription coregulator activity                                                  | 24/<br>212 | 489/<br>183       | 2.53E-09 | 1.21E-07 | 1.00E-07 | 24 |
| GO:0015399 | MF | GO:0015399 | primary active transmembrane transporter activity                                   | 13/<br>212 | 181/<br>183<br>68 | 1.88E-07 | 8.13E-06 | 6.73E-06 | 13 |
| GO:0003713 | MF | GO:0003713 | transcription coactivator activity                                                  | 15/<br>212 | 262/<br>183       | 4.09E-07 | 1.60E-05 | 1.33E-05 | 15 |
| GO:0051015 | MF | GO:0051015 | actin filament binding                                                              | 11/<br>212 | 217/<br>183       | 4.57E-05 | 0.001645 | 0.001363 | 11 |
| GO:0022804 | MF | GO:0022804 | active transmembrane transporter activity                                           | 15/<br>212 | 406/<br>183       | 7.86E-05 | 0.002612 | 0.002164 | 15 |
| GO:0051539 | MF | GO:0051539 | 4 iron, 4 sulfur cluster binding                                                    | 5/2<br>12  | 42/1<br>836       | 0.000117 | 0.003376 | 0.002797 | 5  |
| GO:0140103 | MF | GO:0140103 | catalytic activity, acting on a glycoprotein                                        | 4/2<br>12  | 23/1<br>836<br>8  | 0.000129 | 0.003376 | 0.002797 | 4  |
| GO:0051536 | MF | GO:0051536 | iron-sulfur cluster binding                                                         | 6/2<br>12  | 68/1<br>836       | 0.000133 | 0.003376 | 0.002797 | 6  |
| GO:0051540 | MF | GO:0051540 | metal cluster binding                                                               | 6/2<br>12  | 68/1<br>836       | 0.000133 | 0.003376 | 0.002797 | 6  |
| GO:0001784 | MF | GO:0001784 | phosphotyrosine residue binding                                                     | 5/2<br>12  | 44/1<br>836       | 0.000147 | 0.003531 | 0.002925 | 5  |

|            |    |            |                                                        |        |           |          |          |          |    |
|------------|----|------------|--------------------------------------------------------|--------|-----------|----------|----------|----------|----|
| GO:0005200 | MF | GO:0005200 | structural constituent of cytoskeleton                 | 7/212  | 103/183   | 0.000192 | 0.004195 | 0.003475 | 7  |
| GO:0003779 | MF | GO:0003779 | actin binding                                          | 15/212 | 441/183   | 0.000195 | 0.004195 | 0.003475 | 15 |
| GO:0140297 | MF | GO:0140297 | DNA-binding transcription factor binding               | 14/212 | 394/18368 | 0.000204 | 0.004195 | 0.003475 | 14 |
| GO:0045309 | MF | GO:0045309 | protein phosphorylated amino acid binding              | 5/212  | 56/18368  | 0.000463 | 0.00876  | 0.007258 | 5  |
| GO:0019902 | MF | GO:0019902 | phosphatase binding                                    | 9/212  | 196/183   | 0.000466 | 0.00876  | 0.007258 | 9  |
| GO:0051219 | MF | GO:0051219 | phosphoprotein binding                                 | 6/212  | 88/1836   | 0.000543 | 0.009782 | 0.008104 | 6  |
| GO:0042826 | MF | GO:0042826 | histone deacetylase binding                            | 7/212  | 127/183   | 0.000686 | 0.011849 | 0.009816 | 7  |
| GO:0030295 | MF | GO:0030295 | protein kinase activator activity                      | 6/212  | 101/183   | 0.001123 | 0.01866  | 0.015459 | 6  |
| GO:0031490 | MF | GO:0031490 | chromatin DNA binding                                  | 6/212  | 103/183   | 0.001243 | 0.019891 | 0.016479 | 6  |
| GO:0019209 | MF | GO:0019209 | kinase activator activity                              | 6/212  | 107/183   | 0.001513 | 0.02334  | 0.019336 | 6  |
| GO:0008373 | MF | GO:0008373 | sialyltransferase activity                             | 3/212  | 21/1836   | 0.001729 | 0.025554 | 0.021171 | 3  |
| GO:0004715 | MF | GO:0004715 | non-membrane spanning protein tyrosine kinase activity | 4/212  | 45/18368  | 0.001775 | 0.025554 | 0.021171 | 4  |
| GO:0051020 | MF | GO:0051020 | GTPase binding                                         | 10/212 | 291/183   | 0.002104 | 0.029319 | 0.024289 | 10 |
| GO:0016746 | MF | GO:0016746 | acyltransferase activity                               | 9/212  | 250/183   | 0.002551 | 0.033014 | 0.027351 | 9  |
| GO:0043274 | MF | GO:0043274 | phospholipase binding                                  | 3/212  | 24/1836   | 0.002566 | 0.033014 | 0.027351 | 3  |
| GO:0019887 | MF | GO:0019887 | protein kinase regulator activity                      | 8/212  | 204/183   | 0.002598 | 0.033014 | 0.027351 | 8  |
| GO:0031267 | MF | GO:0031267 | small GTPase binding                                   | 9/212  | 259/183   | 0.003227 | 0.039836 | 0.033003 | 9  |
| GO:0017124 | MF | GO:0017124 | SH3 domain binding                                     | 6/212  | 130/183   | 0.004015 | 0.048179 | 0.039915 | 6  |
