# Supplementary material for: Prognostic Signature Development on the Basis of Macrophage Phagocytosis‐Mediated Oxidative Phosphorylation in Bladder Cancer
Source: Hindawi journal article supplement (doi:10.1155/2022/4754935), 2022-01-01
Supplement: f9 [file 4754935.f9.pdf]

|          | ON TO    | ID       | Description                                       | GeneRa | BgRatio | pvalue   | p.adjust | qvalue   | Count |
|----------|----------|----------|---------------------------------------------------|--------|---------|----------|----------|----------|-------|
| hsa04714 | KE<br>GG | hsa04714 | Thermogenesis                                     | 23/138 | 232/814 | 4.90E-12 | 1.10E-09 | 7.94E-10 | 23    |
| hsa05130 | KE<br>GG | hsa05130 | Pathogenic Escherichia coli infection             | 19/138 | 197/814 | 6.71E-10 | 5.24E-08 | 3.77E-08 | 19    |
| hsa0466  | KE       | hsa0466  | Fc gamma R-mediated                               | 14/138 | 97/814  | 6.98E-10 | 5.24E-08 | 3.77E-08 | 14    |
| hsa05208 | KE<br>GG | hsa05208 | Chemical carcinogenesis - reactive oxygen species | 19/138 | 223/814 | 5.44E-09 | 3.06E-07 | 2.21E-07 | 19    |
| hsa05415 | KE<br>GG | hsa05415 | Diabetic cardiomyopathy                           | 18/138 | 203/814 | 7.57E-09 | 3.41E-07 | 2.46E-07 | 18    |
| hsa04810 | KE<br>GG | hsa04810 | Regulation of actin cytoskeleton                  | 18/138 | 218/814 | 2.33E-08 | 7.87E-07 | 5.67E-07 | 18    |
| hsa04723 | KE<br>GG | hsa04723 | Retrograde endocannabinoid signaling              | 15/138 | 148/814 | 2.45E-08 | 7.87E-07 | 5.67E-07 | 15    |
| hsa04932 | KE<br>GG | hsa04932 | Non-alcoholic fatty liver disease                 | 15/138 | 155/814 | 4.58E-08 | 1.25E-06 | 9.02E-07 | 15    |
| hsa00190 | KE<br>GG | hsa00190 | Oxidative phosphorylation                         | 14/138 | 134/814 | 5.01E-08 | 1.25E-06 | 9.02E-07 | 14    |
| hsa05020 | KE<br>GG | hsa05020 | Prion disease                                     | 19/138 | 273/814 | 1.44E-07 | 3.25E-06 | 2.34E-06 | 19    |
| hsa05012 | KE<br>GG | hsa05012 | Parkinson disease                                 | 18/138 | 266/814 | 4.81E-07 | 9.85E-06 | 7.10E-06 | 18    |
| hsa05010 | KE<br>GG | hsa05010 | Alzheimer disease                                 | 21/138 | 384/814 | 1.70E-06 | 3.18E-05 | 2.29E-05 | 21    |
| hsa05014 | KE<br>GG | hsa05014 | Amyotrophic lateral sclerosis                     | 20/138 | 364/814 | 2.87E-06 | 4.83E-05 | 3.48E-05 | 20    |
| hsa05135 | KE<br>GG | hsa05135 | Yersinia infection                                | 12/138 | 137/814 | 3.16E-06 | 4.83E-05 | 3.48E-05 | 12    |
| hsa04670 | KE<br>GG | hsa04670 | Leukocyte transendothelial migration              | 11/138 | 114/814 | 3.22E-06 | 4.83E-05 | 3.48E-05 | 11    |
| hsa05132 | KE<br>GG | hsa05132 | Salmonella infection                              | 16/138 | 249/814 | 4.30E-06 | 6.05E-05 | 4.36E-05 | 16    |
| hsa04650 | KE<br>GG | hsa04650 | Natural killer cell mediated cytotoxicity         | 11/138 | 131/814 | 1.24E-05 | 0.000165 | 0.000119 | 11    |
| hsa05016 | KE<br>GG | hsa05016 | Huntington disease                                | 17/138 | 306/814 | 1.48E-05 | 0.000185 | 0.000133 | 17    |
| hsa05131 | KE<br>GG | hsa05131 | Shigellosis                                       | 15/138 | 247/814 | 1.72E-05 | 0.000204 | 0.000147 | 15    |
| hsa0051  | KE       | hsa0051  | Mucin type O-glycan                               | 6/13   | 36/8    | 2.72E-05 | 0.000306 | 0.000221 | 6     |
| hsa0510  | KE       | hsa0510  | Bacterial invasion of                             | 8/13   | 77/8    | 4.36E-05 | 0.000467 | 0.000337 | 8     |
| hsa05022 | KE<br>GG | hsa05022 | Pathways of neurodegeneration -                   | 21/138 | 476/814 | 4.61E-05 | 0.000472 | 0.00034  | 21    |
| hsa0466  | KE       | hsa0466  | B cell receptor signaling                         | 8/13   | 82/8    | 6.88E-05 | 0.000673 | 0.000485 | 8     |
| hsa05166 | KE<br>GG | hsa05166 | Human T-cell leukemia virus 1 infection           | 13/138 | 222/814 | 9.38E-05 | 0.00088  | 0.000634 | 13    |
| hsa05235 | KE<br>GG | hsa05235 | PD-L1 expression and PD-1 checkpoint pathway in   | 8/138  | 89/144  | 0.000123 | 0.001111 | 0.000801 | 8     |
| hsa04380 | KE<br>GG | hsa04380 | Osteoclast differentiation                        | 9/138  | 128/814 | 0.000307 | 0.002657 | 0.001914 | 9     |
| hsa0541  | KE       | hsa0541  | Viral myocarditis                                 | 6/13   | 60/8    | 0.000501 | 0.004178 | 0.00301  | 6     |

|          |          |          |                                                 |        |         |          |          |          |    |
|----------|----------|----------|-------------------------------------------------|--------|---------|----------|----------|----------|----|
| hsa04530 | KE<br>GG | hsa04530 | Tight junction                                  | 10/138 | 169/814 | 0.00057  | 0.004583 | 0.003302 | 10 |
| hsa0465  | KE       | hsa0465  | Th1 and Th2 cell                                | 7/13   | 92/8    | 0.00091  | 0.007062 | 0.005088 | 7  |
| hsa0452  | KE       | hsa0452  | Adherens junction                               | 6/13   | 71/8    | 0.001232 | 0.00924  | 0.006657 | 6  |
| hsa04613 | KE<br>GG | hsa04613 | Neutrophil extracellular trap formation         | 10/138 | 190/814 | 0.001404 | 0.010193 | 0.007343 | 10 |
| hsa04140 | KE<br>GG | hsa04140 | Autophagy - animal                              | 8/138  | 141/814 | 0.002651 | 0.018638 | 0.013428 | 8  |
| hsa04150 | KE<br>GG | hsa04150 | mTOR signaling pathway                          | 8/138  | 156/814 | 0.004914 | 0.033506 | 0.02414  | 8  |
| hsa04068 | KE<br>GG | hsa04068 | FoxO signaling pathway                          | 7/138  | 131/814 | 0.006728 | 0.044243 | 0.031876 | 7  |
| hsa04933 | KE<br>GG | hsa04933 | AGE-RAGE signaling pathway in diabetic          | 6/138  | 100/814 | 0.006882 | 0.044243 | 0.031876 | 6  |
| hsa05169 | KE<br>GG | hsa05169 | Epstein-Barr virus infection                    | 9/138  | 202/814 | 0.007243 | 0.045272 | 0.032617 | 9  |
| hsa05205 | KE<br>GG | hsa05205 | Proteoglycans in cancer                         | 9/138  | 205/814 | 0.007949 | 0.048337 | 0.034825 | 9  |
| hsa0514  | KE       | hsa0514  | Leishmaniasis                                   | 5/13   | 77/8    | 0.009679 | 0.056756 | 0.040891 | 5  |
| hsa0514  | KE       | hsa0514  | Malaria                                         | 4/13   | 50/8    | 0.009949 | 0.056756 | 0.040891 | 4  |
| hsa05165 | KE<br>GG | hsa05165 | Human papillomavirus infection                  | 12/138 | 331/814 | 0.010271 | 0.056756 | 0.040891 | 12 |
| hsa0006  | KE       | hsa0006  | Fatty acid elongation                           | 3/13   | 27/8    | 0.010342 | 0.056756 | 0.040891 | 3  |
| hsa05152 | KE<br>GG | hsa05152 | Tuberculosis                                    | 8/138  | 180/814 | 0.011299 | 0.06053  | 0.04361  | 8  |
| hsa04514 | KE<br>GG | hsa04514 | Cell adhesion molecules                         | 7/138  | 149/814 | 0.013169 | 0.06891  | 0.049647 | 7  |
| hsa05163 | KE<br>GG | hsa05163 | Human cytomegalovirus infection                 | 9/138  | 225/814 | 0.014074 | 0.071967 | 0.05185  | 9  |
| hsa04071 | KE<br>GG | hsa04071 | Sphingolipid signaling pathway                  | 6/138  | 119/814 | 0.015456 | 0.075602 | 0.054469 | 6  |
| hsa04722 | KE<br>GG | hsa04722 | Neurotrophin signaling pathway                  | 6/138  | 119/814 | 0.015456 | 0.075602 | 0.054469 | 6  |
| hsa04218 | KE<br>GG | hsa04218 | Cellular senescence                             | 7/138  | 156/814 | 0.016593 | 0.075734 | 0.054564 | 7  |
| hsa05202 | KE<br>GG | hsa05202 | Transcriptional misregulation in cancer         | 8/138  | 193/814 | 0.016634 | 0.075734 | 0.054564 | 8  |
| hsa04919 | KE<br>GG | hsa04919 | Thyroid hormone signaling pathway               | 6/138  | 121/814 | 0.016659 | 0.075734 | 0.054564 | 6  |
| hsa05167 | KE<br>GG | hsa05167 | Kaposi sarcoma-associated herpesvirus infection | 8/138  | 194/814 | 0.017109 | 0.075734 | 0.054564 | 8  |
| hsa0433  | KE       | hsa0433  | Notch signaling pathway                         | 4/13   | 59/8    | 0.017503 | 0.075734 | 0.054564 | 4  |
| hsa0437  | KE       | hsa0437  | VEGF signaling pathway                          | 4/13   | 59/8    | 0.017503 | 0.075734 | 0.054564 | 4  |
| hsa00533 | KE<br>GG | hsa00533 | Glycosaminoglycan biosynthesis - keratan        | 2/138  | 14/814  | 0.022703 | 0.096173 | 0.06929  | 2  |
| hsa0515  | KE       | hsa0515  | Staphylococcus aureus                           | 5/13   | 96/8    | 0.023246 | 0.096173 | 0.06929  | 5  |
| hsa05225 | KE<br>GG | hsa05225 | Hepatocellular carcinoma                        | 7/138  | 168/814 | 0.023857 | 0.096173 | 0.06929  | 7  |
| hsa0125  | KE       | hsa0125  | Biosynthesis of nucleotide                      | 3/13   | 37/8    | 0.024309 | 0.096173 | 0.06929  | 3  |
| hsa0523  | KE       | hsa0523  | Choline metabolism in                           | 5/13   | 98/8    | 0.025151 | 0.096173 | 0.06929  | 5  |
| hsa00603 | KE<br>GG | hsa00603 | Glycosphingolipid biosynthesis - globo and      | 2/138  | 15/814  | 0.025909 | 0.096173 | 0.06929  | 2  |

|              |          |              |                                                  |           |             |          |          |          |   |
|--------------|----------|--------------|--------------------------------------------------|-----------|-------------|----------|----------|----------|---|
| hsa0060      | KE       | hsa0060      | Glycosphingolipid                                | 2/13      | 15/8        | 0.025909 | 0.096173 | 0.06929  | 2 |
| hsa0516<br>4 | KE<br>GG | hsa0516<br>4 | Influenza A                                      | 7/13<br>8 | 171/<br>814 | 0.025969 | 0.096173 | 0.06929  | 7 |
| hsa0534      | KE       | hsa0534      | Primary immunodeficiency                         | 3/13      | 38/8        | 0.026074 | 0.096173 | 0.06929  | 3 |
| hsa0466      | KE       | hsa0466      | Fc epsilon RI signaling                          | 4/13      | 68/8        | 0.027897 | 0.10124  | 0.07294  | 4 |
| hsa0462<br>5 | KE<br>GG | hsa0462<br>5 | C-type lectin receptor signaling pathway         | 5/13<br>8 | 104/<br>814 | 0.031457 | 0.110593 | 0.079679 | 5 |
| hsa0466<br>0 | KE<br>GG | hsa0466<br>0 | T cell receptor signaling pathway                | 5/13<br>8 | 104/<br>814 | 0.031457 | 0.110593 | 0.079679 | 5 |
| hsa0436<br>0 | KE<br>GG | hsa0436<br>0 | Axon guidance                                    | 7/13<br>8 | 182/<br>814 | 0.034805 | 0.119226 | 0.085899 | 7 |
| hsa0411      | KE       | hsa0411      | p53 signaling pathway                            | 4/13      | 73/8        | 0.034973 | 0.119226 | 0.085899 | 4 |
| hsa0513      | KE       | hsa0513      | Pertussis                                        | 4/13      | 76/8        | 0.039675 | 0.131276 | 0.09458  | 4 |
| hsa0521      | KE       | hsa0521      | Pancreatic cancer                                | 4/13      | 76/8        | 0.039675 | 0.131276 | 0.09458  | 4 |
| hsa0466<br>8 | KE<br>GG | hsa0466<br>8 | TNF signaling pathway                            | 5/13<br>8 | 112/<br>814 | 0.041291 | 0.134643 | 0.097006 | 5 |
| hsa0152      | KE       | hsa0152      | EGFR tyrosine kinase                             | 4/13      | 79/8        | 0.04472  | 0.143743 | 0.103562 | 4 |
| hsa0052      | KE       | hsa0052      | Amino sugar and                                  | 3/13      | 49/8        | 0.04984  | 0.157943 | 0.113793 | 3 |
| hsa0521      | KE       | hsa0521      | Colorectal cancer                                | 4/13      | 86/8        | 0.057826 | 0.180706 | 0.130193 | 4 |
| hsa0461<br>1 | KE<br>GG | hsa0461<br>1 | Platelet activation                              | 5/13<br>8 | 124/<br>814 | 0.05919  | 0.182434 | 0.131438 | 5 |
| hsa0401<br>5 | KE<br>GG | hsa0401<br>5 | Rap1 signaling pathway                           | 7/13<br>8 | 210/<br>814 | 0.065665 | 0.198265 | 0.142844 | 7 |
| hsa0078      | KE       | hsa0078      | Lipoic acid metabolism                           | 1/13      | 4/81        | 0.066088 | 0.198265 | 0.142844 | 1 |
| hsa0517<br>0 | KE<br>GG | hsa0517<br>0 | Human immunodeficiency virus 1 infection         | 7/13<br>8 | 212/<br>814 | 0.068353 | 0.20236  | 0.145794 | 7 |
| hsa0121      | KE       | hsa0121      | Fatty acid metabolism                            | 3/13      | 57/8        | 0.071901 | 0.209912 | 0.151235 | 3 |
| hsa0532      | KE       | hsa0532      | Rheumatoid arthritis                             | 4/13      | 93/8        | 0.07277  | 0.209912 | 0.151235 | 4 |
| hsa0521      | KE       | hsa0521      | Endometrial cancer                               | 3/13      | 58/8        | 0.074921 | 0.213384 | 0.153736 | 3 |
| hsa0104      | KE       | hsa0104      | Biosynthesis of unsaturated                      | 2/13      | 27/8        | 0.075976 | 0.213681 | 0.153951 | 2 |
| hsa0521      | KE       | hsa0521      | Prostate cancer                                  | 4/13      | 97/8        | 0.08211  | 0.228084 | 0.164327 | 4 |
| hsa0516<br>2 | KE<br>GG | hsa0516<br>2 | Measles                                          | 5/13<br>8 | 139/<br>814 | 0.086906 | 0.235589 | 0.169735 | 5 |
| hsa0541<br>8 | KE<br>GG | hsa0541<br>8 | Fluid shear stress and atherosclerosis           | 5/13<br>8 | 139/<br>814 | 0.086906 | 0.235589 | 0.169735 | 5 |
| hsa0491<br>4 | KE<br>GG | hsa0491<br>4 | Progesterone-mediated oocyte maturation          | 4/13<br>8 | 102/<br>814 | 0.094575 | 0.253326 | 0.182513 | 4 |
| hsa0406<br>4 | KE<br>GG | hsa0406<br>4 | NF-kappa B signaling pathway                     | 4/13<br>8 | 104/<br>814 | 0.099799 | 0.264173 | 0.190328 | 4 |
| hsa0522      | KE       | hsa0522      | Acute myeloid leukemia                           | 3/13      | 67/8        | 0.1045   | 0.273401 | 0.196977 | 3 |
| hsa0406<br>2 | KE<br>GG | hsa0406<br>2 | Chemokine signaling pathway                      | 6/13<br>8 | 192/<br>814 | 0.107362 | 0.277661 | 0.200046 | 6 |
| hsa0465<br>9 | KE<br>GG | hsa0465<br>9 | Th17 cell differentiation                        | 4/13<br>8 | 108/<br>814 | 0.110639 | 0.279043 | 0.201041 | 4 |
| hsa0493<br>1 | KE<br>GG | hsa0493<br>1 | Insulin resistance                               | 4/13<br>8 | 108/<br>814 | 0.110639 | 0.279043 | 0.201041 | 4 |
| hsa0521      | KE       | hsa0521      | Renal cell carcinoma                             | 3/13      | 69/8        | 0.111617 | 0.279043 | 0.201041 | 3 |
| hsa0512<br>0 | KE<br>GG | hsa0512<br>0 | Epithelial cell signaling in Helicobacter pylori | 3/13<br>8 | 70/<br>144  | 0.115244 | 0.281847 | 0.203062 | 3 |
| hsa0523      | KE       | hsa0523      | Central carbon metabolism                        | 3/13      | 70/8        | 0.115244 | 0.281847 | 0.203062 | 3 |
| hsa0514<br>5 | KE<br>GG | hsa0514<br>5 | Toxoplasmosis                                    | 4/13<br>8 | 112/<br>814 | 0.121983 | 0.29512  | 0.212624 | 4 |

|          |          |          |                                      |           |             |          |          |          |   |
|----------|----------|----------|--------------------------------------|-----------|-------------|----------|----------|----------|---|
| hsa05160 | KE<br>GG | hsa05160 | Hepatitis C                          | 5/13<br>8 | 157/<br>814 | 0.127636 | 0.303454 | 0.218629 | 5 |
| hsa0514  | KE       | hsa0514  | African trypanosomiasis              | 2/13      | 37/8        | 0.129474 | 0.303454 | 0.218629 | 2 |
| hsa0521  | KE       | hsa0521  | Thyroid cancer                       | 2/13      | 37/8        | 0.129474 | 0.303454 | 0.218629 | 2 |
| hsa05203 | KE<br>GG | hsa05203 | Viral carcinogenesis                 | 6/13<br>8 | 204/<br>814 | 0.132429 | 0.303836 | 0.218904 | 6 |
| hsa04217 | KE<br>GG | hsa04217 | Necroptosis                          | 5/13<br>8 | 159/<br>814 | 0.132629 | 0.303836 | 0.218904 | 5 |
| hsa04144 | KE<br>GG | hsa04144 | Endocytosis                          | 7/13<br>8 | 251/<br>814 | 0.133688 | 0.303836 | 0.218904 | 7 |
| hsa0497  | KE       | hsa0497  | Gastric acid secretion               | 3/13      | 76/8        | 0.1379   | 0.307203 | 0.22133  | 3 |
| hsa0522  | KE       | hsa0522  | Chronic myeloid leukemia             | 3/13      | 76/8        | 0.1379   | 0.307203 | 0.22133  | 3 |
| hsa05161 | KE<br>GG | hsa05161 | Hepatitis B                          | 5/13<br>8 | 162/<br>814 | 0.140281 | 0.309443 | 0.222944 | 5 |
| hsa04151 | KE<br>GG | hsa04151 | PI3K-Akt signaling pathway           | 9/13<br>8 | 354/<br>814 | 0.146168 | 0.319298 | 0.230044 | 9 |
| hsa0521  | KE       | hsa0521  | Bladder cancer                       | 2/13      | 41/8        | 0.152775 | 0.328832 | 0.236913 | 2 |
| hsa04310 | KE<br>GG | hsa04310 | Wnt signaling pathway                | 5/13<br>8 | 167/<br>814 | 0.153455 | 0.328832 | 0.236913 | 5 |
| hsa05417 | KE<br>GG | hsa05417 | Lipid and atherosclerosis            | 6/13<br>8 | 215/<br>814 | 0.157648 | 0.334629 | 0.24109  | 6 |
| hsa0086  | KE       | hsa0086  | Porphyrin metabolism                 | 2/13      | 43/8        | 0.164716 | 0.346365 | 0.249544 | 2 |
| hsa04114 | KE<br>GG | hsa04114 | Oocyte meiosis                       | 4/13<br>8 | 131/<br>814 | 0.181928 | 0.37758  | 0.272034 | 4 |
| hsa0493  | KE       | hsa0493  | Type II diabetes mellitus            | 2/13      | 46/8        | 0.182916 | 0.37758  | 0.272034 | 2 |
| hsa0051  | KE       | hsa0051  | Other types of O-glycan              | 2/13      | 47/8        | 0.189049 | 0.386691 | 0.278598 | 2 |
| hsa04210 | KE<br>GG | hsa04210 | Apoptosis                            | 4/13<br>8 | 136/<br>814 | 0.199114 | 0.398949 | 0.28743  | 4 |
| hsa04014 | KE<br>GG | hsa04014 | Ras signaling pathway                | 6/13<br>8 | 232/<br>814 | 0.200361 | 0.398949 | 0.28743  | 6 |
| hsa05171 | KE<br>GG | hsa05171 | Coronavirus disease - COVID-19       | 6/13<br>8 | 232/<br>814 | 0.200361 | 0.398949 | 0.28743  | 6 |
| hsa0522  | KE       | hsa0522  | Small cell lung cancer               | 3/13      | 92/8        | 0.204438 | 0.403496 | 0.290706 | 3 |
| hsa0051  | KE       | hsa0051  | N-Glycan biosynthesis                | 2/13      | 50/8        | 0.207604 | 0.405052 | 0.291827 | 2 |
| hsa0491  | KE       | hsa0491  | GnRH signaling pathway               | 3/13      | 93/8        | 0.208827 | 0.405052 | 0.291827 | 3 |
| hsa0465  | KE       | hsa0465  | IL-17 signaling pathway              | 3/13      | 94/8        | 0.213237 | 0.410071 | 0.295443 | 3 |
| hsa04120 | KE<br>GG | hsa04120 | Ubiquitin mediated proteolysis       | 4/13<br>8 | 142/<br>814 | 0.220357 | 0.416642 | 0.300177 | 4 |
| hsa04936 | KE<br>GG | hsa04936 | Alcoholic liver disease              | 4/13<br>8 | 142/<br>814 | 0.220357 | 0.416642 | 0.300177 | 4 |
| hsa04010 | KE<br>GG | hsa04010 | MAPK signaling pathway               | 7/13<br>8 | 294/<br>814 | 0.231061 | 0.433239 | 0.312134 | 7 |
| hsa04072 | KE<br>GG | hsa04072 | Phospholipase D signaling pathway    | 4/13<br>8 | 148/<br>814 | 0.242178 | 0.450331 | 0.324449 | 4 |
| hsa05142 | KE<br>GG | hsa05142 | Chagas disease                       | 3/13<br>8 | 102/<br>814 | 0.249172 | 0.459539 | 0.331083 | 3 |
| hsa04510 | KE<br>GG | hsa04510 | Focal adhesion                       | 5/13<br>8 | 201/<br>814 | 0.254521 | 0.464948 | 0.33498  | 5 |
| hsa04145 | KE<br>GG | hsa04145 | Phagosome                            | 4/13<br>8 | 152/<br>814 | 0.256994 | 0.464948 | 0.33498  | 4 |
| hsa04620 | KE<br>GG | hsa04620 | Toll-like receptor signaling pathway | 3/13<br>8 | 104/<br>814 | 0.258305 | 0.464948 | 0.33498  | 3 |

|              |          |              |                                                  |           |             |          |          |          |   |
|--------------|----------|--------------|--------------------------------------------------|-----------|-------------|----------|----------|----------|---|
| hsa0492<br>1 | KE<br>GG | hsa0492<br>1 | Oxytocin signaling pathway                       | 4/13<br>8 | 154/<br>814 | 0.264472 | 0.467838 | 0.337062 | 4 |
| hsa0006      | KE       | hsa0006      | Fatty acid biosynthesis                          | 1/13      | 18/8        | 0.265046 | 0.467838 | 0.337062 | 1 |
| hsa0492<br>8 | KE<br>GG | hsa0492<br>8 | Parathyroid hormone<br>synthesis, secretion and  | 3/13<br>8 | 106/<br>814 | 0.267482 | 0.467838 | 0.337062 | 3 |
| hsa0493<br>4 | KE<br>GG | hsa0493<br>4 | Cushing syndrome                                 | 4/13<br>8 | 155/<br>814 | 0.268227 | 0.467838 | 0.337062 | 4 |
| hsa0473      | KE       | hsa0473      | Long-term depression                             | 2/13      | 60/8        | 0.270426 | 0.468045 | 0.337212 | 2 |
| hsa0439<br>0 | KE<br>GG | hsa0439<br>0 | Hippo signaling pathway                          | 4/13<br>8 | 157/<br>814 | 0.275766 | 0.469502 | 0.338261 | 4 |
| hsa0053      | KE       | hsa0053      | Glycosaminoglycan                                | 1/13      | 19/8        | 0.277528 | 0.469502 | 0.338261 | 1 |
| hsa0121      | KE       | hsa0121      | 2-Oxocarboxylic acid                             | 1/13      | 19/8        | 0.277528 | 0.469502 | 0.338261 | 1 |
| hsa0520<br>7 | KE<br>GG | hsa0520<br>7 | Chemical carcinogenesis -<br>receptor activation | 5/13<br>8 | 212/<br>814 | 0.290327 | 0.487489 | 0.35122  | 5 |
| hsa0463<br>0 | KE<br>GG | hsa0463<br>0 | JAK-STAT signaling<br>pathway                    | 4/13<br>8 | 162/<br>814 | 0.294761 | 0.491268 | 0.353943 | 4 |
