# Supplementary material for: Prognostic Signature Development on the Basis of Macrophage Phagocytosis‐Mediated Oxidative Phosphorylation in Bladder Cancer
Source: Hindawi journal article supplement (doi:10.1155/2022/4754935), 2022-01-01
Supplement: f10 [file 4754935.f10.pdf]

| Gene    | P value    |
|---------|------------|
| IER5L   | 1.3E-10    |
| NFIA    | 2.6E-10    |
| GTPBP3  | 2.7E-10    |
| PPAP2B  | 5.3E-10    |
| CMC1    | 2.1E-09    |
| KIF23   | 2.4E-09    |
| TIMMDC1 | 4.1E-09    |
| HMBS    | 5.2E-09    |
| LAMTOR2 | 0.00000006 |
| TACO1   | 0.00000014 |
| PTDSS1  | 0.00000018 |
| CIT     | 0.00000021 |
| HIC1    | 0.00000025 |
| CDK2    | 0.0000003  |
| SLC25A1 | 0.00000034 |
| RNF122  | 0.0000007  |
| MECR    | 0.0000012  |
| SIX4    | 0.0000016  |
| OTUB1   | 0.0000021  |
| KLF6    | 0.0000031  |
| EMC1    | 0.0000035  |
| ARPC3   | 0.0000044  |
| DOLPP1  | 0.0000049  |
| PDCD10  | 0.0000051  |
| FADD    | 0.0000058  |
| QPCTL   | 0.000006   |
| FOXO1   | 0.0000085  |
| OSTC    | 0.0000086  |
| TCEB1   | 0.000013   |
| HMGB2   | 0.000014   |
| NDUFS8  | 0.000016   |
| NDUFBC  | 0.000017   |
| APMAP   | 0.000025   |
| ARPC4   | 0.000029   |
| NDUFS6  | 0.000035   |
| ZNF746  | 0.00005    |
| NDUFB4  | 0.000067   |
| NDUAF7  | 0.000088   |
| NDUFA9  | 0.000099   |
| UQCC1   | 0.000014   |
| ADAM10  | 0.000019   |
| LCMT1   | 0.000019   |
| MYC     | 0.000022   |
| SUPT20H | 0.000026   |
| XPR1    | 0.000026   |
| NCKAP1L | 0.000031   |

|           |          |
|-----------|----------|
| TMEM165   | 0.000031 |
| NDUFS2    | 0.000032 |
| AIFM1     | 0.000033 |
| CHMP1A    | 0.000038 |
| TMEM119   | 0.000039 |
| DOCK11    | 0.000056 |
| MAP3K3    | 0.000062 |
| COX18     | 0.000079 |
| CD79B     | 0.000081 |
| CMAS      | 0.000086 |
| MAP3K10   | 0.000092 |
| ANAPC7    | 0.0001   |
| WASF2     | 0.0001   |
| NDUFB9    | 0.00014  |
| COX5B     | 0.00015  |
| ALAD      | 0.00016  |
| LIPT2     | 0.00019  |
| NXT1      | 0.0002   |
| TP73      | 0.0002   |
| STARD7    | 0.00021  |
| JAK1      | 0.00022  |
| JMJD1C    | 0.00023  |
| SLC9A3R1  | 0.00024  |
| LIMK2     | 0.00027  |
| MGAT1     | 0.00035  |
| GRSF1     | 0.00042  |
| SLC39A9   | 0.0006   |
| HMGB1     | 0.00063  |
| CLIC4     | 0.00064  |
| VCAM1     | 0.00075  |
| C1GALT1   | 0.00097  |
| SPPL3     | 0.001    |
| ELOVL1    | 0.0011   |
| NHLRC2    | 0.0011   |
| PTEN      | 0.0012   |
| C1GALT1C1 | 0.0014   |
| LAMTOR4   | 0.0014   |
| ACTR2     | 0.0021   |
| SLC25A1   | 0.0023   |
| OSR2      | 0.0027   |
| UBE2K     | 0.0029   |
| ELOVL6    | 0.0029   |
| CADM1     | 0.003    |
| VPS37A    | 0.0035   |
| RRAGA     | 0.0037   |
| SAMD4B    | 0.0038   |
| RAC1      | 0.0039   |

|          |          |
|----------|----------|
| WDR1     | 0.004    |
| RPL21    | 0.0046   |
| NDUFA1   | 0.0048   |
| TM2D1    | 0.005    |
| MTIF3    | 0.0051   |
| GNE      | 0.0063   |
| NDUFV1   | 0.0065   |
| MAML2    | 0.0075   |
| ARID1B   | 0.008    |
| GRHL1    | 0.0082   |
| FTN4IP1  | 0.0086   |
| FOXO4    | 0.0088   |
| STK4     | 0.0088   |
| CAB39    | 0.0089   |
| ZFX      | 0.0094   |
| GTPBP6   | 0.0095   |
| ACTB     | 0.0098   |
| PTPRC    | 0.0099   |
| NDUFC1   | 0.012    |
| C5AR1    | 0.015    |
| UBE2J1   | 0.015    |
| UBR4     | 0.015    |
| SLC39A13 | 0.017    |
| ZNF217   | 0.017    |
| PRDM1    | 0.022    |
| SMAGP    | 0.023    |
| HRCT1    | 0.024    |
| NANS     | 0.024    |
| MYO9B    | 0.025    |
| ZBTB7A   | 0.028    |
| LPIN2    | 0.03     |
| MSN      | 0.03     |
| TLE3     | 0.033    |
| AIP      | 0.035    |
| PDE12    | 0.036    |
| SS18     | 0.036    |
| MOB3A    | 0.043    |
| ARSB     | 0.046    |
| CYFIP1   | 0.049    |
| LRRC15   | 0.049    |
| UBE2D3   | 0.054    |
| NDUFB6   | 0.055    |
| NUBPL    | 0.13     |
| MUC1     | 0.25     |
| PTPN6    | 0,000049 |
